# Supplementary material
Source: publisher figshare collection journal article supplement (https://acs.figshare.com/ndownloader/files/22441217)
Supplement: Supplementary file 1 [file 22441217]

## Sheet: proteomics summary
	S. epidermidis RP62A Uniprot ID (gene locus)	NIH LM031	W23144	NIH LM061	NIH LM040	NIH LM087	NIH LM095	RP62A	NIH LM088	NIH05001	NIH LM049	NIH LM018	SK135	BCM-HMP0060	ATCC 14990	ATCC 12228	NCTC 9865	KPL1815	# strains ID'ed in	Predicted by ESTHER	Predicted by MEROPS	Predicted InterPro domains
1	Q5HKP6 (SERP2297)	x	x	x	x	x	x	x	x	x	x	x	x	x	x	x	x	x	17	x		AB_hydrolase; YSIRK_signal_dom
1	Q5HKK8 (SERP2336)	x	x								x					x			4	x		AB_hydrolase; YSIRK_signal_dom
1	Q5HKF8 (SERP2388)	x	x	x		x	x	x	x	x	x		x	x		x	x		13	x		AB_hydrolase; YSIRK_signal_dom
1	Q5HS21 (SERP0018)	x			x	x	x				x	x			x	x		x	9	x		AB_hydrolase; YSIRK_signal_dom
1	Q5HLF2 (SERP2035)										x		x			x		x	4	x	x	AB_hydrolase; CarbesteraseB; Carboxylesterase_B_AS
1	Q5HL78 (SERP2109)	x		x		x			x	x	x	x		x	x	x	x	x	12	x	x	AB_hydrolase; AB_hydrolase_3
1	Q5HPN9 (SERP0869)	x	x	x		x	x			x	x	x	x	x	x	x	x	x	14	x	x	AB_hydrolase; Hydrolase_4
1	Q5HM42 (SERP1788)	x		x		x	x		x			x				x			7	x		AB_hydrolase; DUF915_hydro-like
1	Q5HKU7 (SERP2245)	x	x	x	x	x	x	x	x	x	x	x	x	x	x	x	x	x	17	x	x	AB_hydrolase; Esterase_put
1	Q5HKJ1 (SERP2354)	x		x		x	x				x	x				x			7	x	x	AB_hydrolase; Esterase_put
1	Q5HNB6 (SERP1354)	x				x	x				x					x		x	6	x	x	AB_hydrolase; Epimerase_deHydtase; Peptidase_S9
1	Q5HQU7 (SERP0449)	x	x	x	x	x	x	x	x	x	x	x	x	x	x	x	x	x	17	x	x	AB_hydrolase; Esterase_lipase; Hydrolase_4
1	Q5HRV2 (SERP0090)	x	x	x	x	x	x	x	x	x	x	x	x	x	x	x	x	x	17	x	x	AB_hydrolase; Esterase_lipase; Hydrolase_4
1	Q5HQF0 (SERP0603)	x	x	x	x	x	x			x	x	x	x	x	x	x	x	x	15	x	x	AB_hydrolase; Esterase_put
1	Q5HR84 (SERP0309)	x	x	x		x	x			x	x	x	x	x	x	x	x	x	14	x	x	AB_hydrolase; AB_hydrolase_3
1	Q5HQW0 (SERP0436)	x		x		x	x				x	x			x	x		x	9		x	ClpP; ClpP/crotonase-like_dom_sf; ClpP/TepA; ClpP_His_AS; ClpP_Ser_AS
1	Q5HN75 (SERP1397)	x	x								x	x			x	x			6		x	Peptidase_S1_PA; Peptidase_S1B; Peptidase_S1B_tx; V8_ser_AS
1	Q5HKE5 (SERP2401)			x						x	x			x					4		x	Peptidase_S1_PA; Peptidase_S1B
2	Q5HKT5 (SERP2257)			x		x	x				x	x		x		x	x	x	9			23BDH; NAD(P)-bd_dom_sf; Sc_DH/Rdtase_CS; SDR_fam
2	Q5HMS2 (SERP1556)	x				x	x		x	x	x					x			7			--
2	Q5HNJ5 (SERP1273)	x		x		x	x				x	x				x		x	8			Rossmann-like_a/b/a_fold; Universal_stress_UspA; UspA
2	Q5HRH4 (SERP0219)	x		x		x	x			x	x				x				7			AMP-binding_CS; AMP-dep_Synth/Lig; AMP-dep_Synthh-like_sf
2	Q5HKG2 (SERP2383)					x					x	x				x		x	5			AdhesinB; Lipoprotein_4; ZnuA-like
3	Q5HQ53 (SERP0704)	x	x	x	x	x	x	x	x	x	x	x	x	x	x	x	x	x	17			Aldolase_TIM; ATP-grasp; BC-like_N; Biotin_carboxylation_dom; Biotin_Coase_C; Biotin_lipoyl; Carboxylase_cons_dom; CbamoylP_synth_lsu-like_ATP-bd; PreATP-grasp_dom_sf; PYR_CT; Pyruv_Coase; Rudment_hybrid_motif
3	Q5HNU4 (SERP1170)	x	x	x	x	x	x	x	x	x	x	x	x	x	x	x	x	x	17			Biotin_lipoyl; Single_hybrid_motif
3	Q5HP25 (SERP1088)	x	x	x	x	x	x	x	x		x		x	x	x	x		x	14			AcCoA_biotinCC; Biotin_lipoyl; Single_hybrid_motif
3	Q5HRK4 (SERP0189)	x		x		x	x				x		x	x	x	x	x		10			EF-Tu_GTP-bd; EFTu-like_2; EFTU_2; G_TR_CS; P-loop_NTPase; Small_GTP-bd_dom; TF_GTP-bd_dom; Transl_B-barrel_sf; Transl_elong_EF1A/Init_IF2_C; Transl_elong_EFTu/EF1A_bac/org; Transl_elong_EFTu/EF1A_C
3	Q5HL59 (SERP2128)	x		x			x			x	x	x				x			7			Ald_DH/histidinol_DH; Ald_DH_C; Ald_DH_CS_CYS; Ald_DH_CS_GLU; Ald_DH_N; Aldehyde_DH_dom; RocA
3	Q5HRK7 (SERP0186)	x		x										x		x			4			NA-bd_OB-fold; Ribosomal_S12/S23; Ribosomal_S12_bac
3	Q5HQ01 (SERP0756)			x		x								x		x			4			Nucleotide-bd_a/b_plait_sf; S4_RNA-bd; S4_RNA-bd_sf; YlmH_RBD
3	Q5HMI8 (SERP1640)	x				x	x				x					x			5			Dup_hybrid_motif; Peptidase_M23; Phage_lysozyme2; Phage_tape_meas
	** All hits identified in at least 4 of 17 strains of S. epidermidis
1	Likely serine hydrolase = Predicted by either ESTHER and/or MEROPS databases, annotated with a hydrolase-relevant InterPro domain
2	Unlikely serine hydrolase = Not predicted by either ESTHER or MEROPS databases, not annotated with a hydrolase-relevant InterPro domain
3	Not a serine hydrolase = Annotated as a biotin-interacting or ribosomal-related protein or has a known non-serine catalytic residue

## Sheet: spectral counts from proteomics
S. epidermidis RP62A Uniprot ID (gene locus)	NIH LM031	W23144	NIH LM061	NIH LM040	NIH LM087	NIH LM095	RP62A	NIH LM088	NIH05001	NIH LM049	NIH LM018	SK135	BCM-HMP0060	ATCC 14990	ATCC 12228	NCTC 9865	KPL1815
tr|Q5HQ53|Q5HQ53_STAE - Pyruvate carboxylase OS=Staphylococcus epidermidis (strain ATCC 35984 / RP62A) OX=176279 GN=pyc PE=4 SV=1 xxxxx	193	29	283	24	233	205	32	85	78	201	287	62	186	42	239	66	93
sp|Q5HKP6|LIP_STAEQ - Lipase OS=Staphylococcus epidermidis (strain ATCC 35984 / RP62A) OX=176279 GN=lip PE=3 SV=1 xxxxx	25	48	17	234	80	164	26	14	4	129	87	144	326	13	512	8	58
tr|Q5HQU7|Q5HQU7_STAE - Carboxylesterase OS=Staphylococcus epidermidis (strain ATCC 35984 / RP62A) OX=176279 GN=est PE=4 SV=1 xxxxx	14	6	95	2	61	35	13	9	132	42	20	73	122	9	88	43	67
tr|Q5HKF8|Q5HKF8_STAE - Lipase OS=Staphylococcus epidermidis (strain ATCC 35984 / RP62A) OX=176279 GN=geh-2 PE=4 SV=1 xxxxx	41	73	85	0	34	29	15	4	14	67	0	7	10	0	177	7	0
tr|Q5HKU7|Q5HKU7_STAE - Tributyrin esterase EstA, putative OS=Staphylococcus epidermidis (strain ATCC 35984 / RP62A) OX=176279 GN=SERP2245 PE=4 SV=1 xxxxx	21	13	38	6	18	27	12	19	47	30	49	17	15	8	54	20	19
tr|Q5HRV2|Q5HRV2_STAE - Carboxylesterase, putative OS=Staphylococcus epidermidis (strain ATCC 35984 / RP62A) OX=176279 GN=SERP0090 PE=4 SV=1 xxxxx	6	11	22	6	28	12	4	6	6	25	34	12	4	5	22	7	17
tr|Q5HS21|Q5HS21_STAE - Lipase, putative OS=Staphylococcus epidermidis (strain ATCC 35984 / RP62A) OX=176279 GN=SERP0018 PE=4 SV=1 xxxxx	2	0	0	23	20	54	0	0	0	6	13	0	0	1	21	0	3
tr|Q5HNU4|Q5HNU4_STAE - Acetyl-CoA carboxylase, biotin carboxyl carrier protein, putative OS=Staphylococcus epidermidis (strain ATCC 35984 / RP62A) OX=176279 GN=SERP1170 PE=4 SV=1 xxxxx	24	11	4	1	8	12	2	5	7	3	15	21	9	5	4	2	9
tr|Q5HPN9|Q5HPN9_STAE - Hydrolase, alpha/beta hydrolase fold family OS=Staphylococcus epidermidis (strain ATCC 35984 / RP62A) OX=176279 GN=SERP0869 PE=4 SV=1 xxxxx	9	1	14	0	9	7	0	0	3	11	15	8	8	6	12	1	16
tr|Q5HR84|Q5HR84_STAE - Lipase/esterase, putative OS=Staphylococcus epidermidis (strain ATCC 35984 / RP62A) OX=176279 GN=SERP0309 PE=4 SV=1 xxxxx	10	3	5	0	5	8	0	0	2	10	14	5	12	1	14	5	6
tr|Q5HKK8|Q5HKK8_STAE - Lipase, putative OS=Staphylococcus epidermidis (strain ATCC 35984 / RP62A) OX=176279 GN=SERP2336 PE=4 SV=1 xxxxx	7	13	0	0	0	0	0	0	0	13	0	0	0	0	43	0	0
tr|Q5HQF0|Q5HQF0_STAE - Uncharacterized protein OS=Staphylococcus epidermidis (strain ATCC 35984 / RP62A) OX=176279 GN=SERP0603 PE=4 SV=1 xxxxx	4	4	6	1	8	5	0	0	3	10	7	4	2	3	12	1	1
tr|Q5HL78|Q5HL78_STAE - Esterase, putative OS=Staphylococcus epidermidis (strain ATCC 35984 / RP62A) OX=176279 GN=SERP2109 PE=4 SV=1 xxxxx	1	0	8	0	2	0	0	1	5	16	13	0	1	3	7	1	5
tr|Q5HP25|Q5HP25_STAE - Biotin carboxyl carrier protein of acetyl-CoA carboxylase OS=Staphylococcus epidermidis (strain ATCC 35984 / RP62A) OX=176279 GN=accB PE=4 SV=1 xxxxx	7	1	6	2	6	4	1	5	0	5	0	2	6	3	9	0	4
Reverse_tr|Q5HRE4|Q5H - IS431mec-like transposase OS=Staphylococcus epidermidis (strain ATCC 35984 / RP62A) OX=176279 GN=SERP0249 PE=4 SV=1 xxxxx	2	1	2	0	4	5	1	2	1	6	16	5	1	3	4	3	0
sp|Q5HRK4|EFTU_STAEQ - Elongation factor Tu OS=Staphylococcus epidermidis (strain ATCC 35984 / RP62A) OX=176279 GN=tuf PE=3 SV=1 xxxxx	5	0	6	0	3	4	0	0	0	8	0	3	2	2	5	1	0
sp|Q5HN75|GSEA_STAEQ - Glutamyl endopeptidase OS=Staphylococcus epidermidis (strain ATCC 35984 / RP62A) OX=176279 GN=gseA PE=3 SV=1 xxxxx	3	1	0	0	0	0	0	0	0	6	12	0	0	4	5	0	0
tr|Q5HM42|Q5HM42_STAE - Uncharacterized protein OS=Staphylococcus epidermidis (strain ATCC 35984 / RP62A) OX=176279 GN=SERP1788 PE=4 SV=1 xxxxx	1	0	5	0	2	8	0	1	0	0	8	0	0	0	6	0	0
Reverse_tr|Q5HLK0|Q5H - Respiratory nitrate reductase, alpha subunit OS=Staphylococcus epidermidis (strain ATCC 35984 / RP62A) OX=176279 GN=narG PE=3 SV=1 xxxxx	1	0	3	0	3	4	0	1	0	4	0	3	0	0	10	0	0
sp|Q5HM11|RL5_STAEQ - 50S ribosomal protein L5 OS=Staphylococcus epidermidis (strain ATCC 35984 / RP62A) OX=176279 GN=rplE PE=3 SV=1 xxxxx	1	0	2	2	0	5	3	1	1	0	5	2	0	0	2	1	2
tr|Q5HKJ1|Q5HKJ1_STAE - Tributyrin esterase EstA, putative OS=Staphylococcus epidermidis (strain ATCC 35984 / RP62A) OX=176279 GN=SERP2354 PE=4 SV=1 xxxxx	2	0	3	0	5	4	0	0	0	3	4	0	0	0	3	0	0
tr|Q5HNB6|Q5HNB6_STAE - Uncharacterized protein OS=Staphylococcus epidermidis (strain ATCC 35984 / RP62A) OX=176279 GN=SERP1354 PE=4 SV=1 xxxxx	6	0	0	0	2	3	0	0	0	3	0	0	0	0	5	0	4
tr|Q5HKT5|Q5HKT5_STAE - Oxidoreductase, short-chain dehydrogenase/reductase family OS=Staphylococcus epidermidis (strain ATCC 35984 / RP62A) OX=176279 GN=SERP2257 PE=4 SV=1 xxxxx	0	0	2	0	3	3	0	0	0	2	6	0	1	0	2	1	1
tr|Q5HMS2|Q5HMS2_STAE - Uncharacterized protein OS=Staphylococcus epidermidis (strain ATCC 35984 / RP62A) OX=176279 GN=SERP1556 PE=4 SV=1 xxxxx	1	0	0	0	2	2	0	4	1	2	0	0	0	0	8	0	0
sp|Q5HNJ5|Y1273_STAEQ - Putative universal stress protein SERP1273 OS=Staphylococcus epidermidis (strain ATCC 35984 / RP62A) OX=176279 GN=SERP1273 PE=3 SV=1 xxxxx	1	0	1	0	2	2	0	0	0	1	6	0	0	0	2	0	3
tr|Q5HKE5|Q5HKE5_STAE - Serine protease OS=Staphylococcus epidermidis (strain ATCC 35984 / RP62A) OX=176279 GN=SERP2401 PE=3 SV=1 xxxxx	0	0	1	0	0	0	0	0	1	12	0	0	3	0	0	0	0
sp|Q5HQW0|CLPP_STAEQ - ATP-dependent Clp protease proteolytic subunit OS=Staphylococcus epidermidis (strain ATCC 35984 / RP62A) OX=176279 GN=clpP PE=3 SV=1 xxxxx	1	0	2	0	2	1	0	0	0	2	4	0	0	2	1	0	1
Reverse_tr|Q5HPX1|Q5H - Serine/threonine protein kinase, putative OS=Staphylococcus epidermidis (strain ATCC 35984 / RP62A) OX=176279 GN=SERP0786 PE=4 SV=1 xxxxx	3	0	0	0	2	2	0	0	3	2	0	0	0	0	1	0	2
sp|Q5HRH4|VRAA_STAEQ - Putative long chain fatty acid-CoA ligase VraA OS=Staphylococcus epidermidis (strain ATCC 35984 / RP62A) OX=176279 GN=vraA PE=3 SV=1 xxxxx	1	0	1	0	2	2	0	0	1	2	0	0	0	2	0	0	0
sp|Q5HL59|ROCA_STAEQ - 1-pyrroline-5-carboxylate dehydrogenase OS=Staphylococcus epidermidis (strain ATCC 35984 / RP62A) OX=176279 GN=rocA PE=3 SV=1 xxxxx	1	0	1	0	0	1	0	0	1	2	1	0	0	0	1	0	0
Reverse_sp|Q5HQ35|SYF - Phenylalanine--tRNA ligase beta subunit OS=Staphylococcus epidermidis (strain ATCC 35984 / RP62A) OX=176279 GN=pheT PE=3 SV=1 xxxxx	0	0	0	0	1	0	0	0	0	1	0	1	0	0	2	0	3
sp|Q5HM02|RL2_STAEQ - 50S ribosomal protein L2 OS=Staphylococcus epidermidis (strain ATCC 35984 / RP62A) OX=176279 GN=rplB PE=3 SV=1 xxxxx	0	0	0	0	1	5	0	0	0	0	0	0	0	0	2	0	0
Reverse_tr|Q5HPN3|Q5H - Glutamine synthetase repressor OS=Staphylococcus epidermidis (strain ATCC 35984 / RP62A) OX=176279 GN=glnR PE=4 SV=1 xxxxx	0	0	0	0	1	0	2	1	1	0	2	0	0	0	0	0	0
tr|Q5HKG2|Q5HKG2_STAE - ABC transporter, substrate-binding protein OS=Staphylococcus epidermidis (strain ATCC 35984 / RP62A) OX=176279 GN=SERP2383 PE=3 SV=1 xxxxx	0	0	0	0	1	0	0	0	0	2	2	0	0	0	1	0	1
sp|Q5HRK7|RS12_STAEQ - 30S ribosomal protein S12 OS=Staphylococcus epidermidis (strain ATCC 35984 / RP62A) OX=176279 GN=rpsL PE=3 SV=1 xxxxx	1	0	1	0	0	0	0	0	0	0	0	0	1	0	3	0	0
tr|Q5HQ01|Q5HQ01_STAE - YlmH protein OS=Staphylococcus epidermidis (strain ATCC 35984 / RP62A) OX=176279 GN=ylmH PE=4 SV=1 xxxxx	0	0	1	0	1	0	0	0	0	0	0	0	2	0	2	0	0
sp|Q5HR69|SCDA_STAEQ - Iron-sulfur cluster repair protein ScdA OS=Staphylococcus epidermidis (strain ATCC 35984 / RP62A) OX=176279 GN=scdA PE=3 SV=1 xxxxx	0	2	1	0	0	0	0	0	0	0	0	0	0	0	0	0	3
tr|Q5HMI8|Q5HMI8_STAE - M23/M37 peptidase domain protein OS=Staphylococcus epidermidis (strain ATCC 35984 / RP62A) OX=176279 GN=SERP1640 PE=4 SV=1 xxxxx	1	0	0	0	1	1	0	0	0	1	0	0	0	0	1	0	0
sp|Q5HPS2|IF2_STAEQ - Translation initiation factor IF-2 OS=Staphylococcus epidermidis (strain ATCC 35984 / RP62A) OX=176279 GN=infB PE=3 SV=1 xxxxx	0	0	0	1	0	2	0	0	0	0	0	0	0	0	2	0	0
sp|Q5HKH9|PFLB_STAEQ - Formate acetyltransferase OS=Staphylococcus epidermidis (strain ATCC 35984 / RP62A) OX=176279 GN=pflB PE=3 SV=1 xxxxx	0	0	0	0	1	0	0	0	0	0	0	2	2	0	0	0	0
Reverse_sp|Q5HPA2|EBH - Extracellular matrix-binding protein ebh OS=Staphylococcus epidermidis (strain ATCC 35984 / RP62A) OX=176279 GN=ebh PE=4 SV=2 xxxxx	0	0	1	1	0	0	0	0	0	0	0	0	0	0	2	0	0
Reverse_tr|Q5HKX9|Q5H - Alkaline phosphatase family protein OS=Staphylococcus epidermidis (strain ATCC 35984 / RP62A) OX=176279 GN=SERP2208 PE=3 SV=1 xxxxx	0	0	0	0	1	1	0	1	0	1	0	0	0	0	0	0	0
tr|Q5HLF2|Q5HLF2_STAE - Carboxylic ester hydrolase OS=Staphylococcus epidermidis (strain ATCC 35984 / RP62A) OX=176279 GN=SERP2035 PE=3 SV=1 xxxxx	0	0	0	0	0	0	0	0	0	1	0	1	0	0	1	0	1
tr|Q5HMI6|Q5HMI6_STAE - Uncharacterized protein OS=Staphylococcus epidermidis (strain ATCC 35984 / RP62A) OX=176279 GN=SERP1642 PE=4 SV=1 xxxxx	0	0	0	0	0	1	0	0	0	2	0	1	0	0	0	0	0
tr|Q5HPX8|Q5HPX8_STAE - Primosomal protein N' OS=Staphylococcus epidermidis (strain ATCC 35984 / RP62A) OX=176279 GN=priA PE=3 SV=1 xxxxx	0	0	0	0	0	0	0	0	0	0	0	0	2	0	2	0	0
sp|Q5HRL0|RPOB_STAEQ - DNA-directed RNA polymerase subunit beta OS=Staphylococcus epidermidis (strain ATCC 35984 / RP62A) OX=176279 GN=rpoB PE=3 SV=1 xxxxx	0	0	0	0	0	0	0	0	0	0	0	0	0	0	1	0	3
tr|Q5HPR9|Q5HPR9_STAE - Riboflavin biosynthesis protein OS=Staphylococcus epidermidis (strain ATCC 35984 / RP62A) OX=176279 GN=ribF PE=3 SV=1 xxxxx	1	1	0	0	0	1	0	0	0	0	0	0	0	0	0	0	0
Reverse_tr|Q5HN70|Q5H - Uncharacterized protein OS=Staphylococcus epidermidis (strain ATCC 35984 / RP62A) OX=176279 GN=SERP1402 PE=4 SV=1 xxxxx	1	0	0	0	0	0	0	0	0	2	0	0	0	0	0	0	0
Reverse_tr|Q5HQU6|Q5H - Ribonuclease R OS=Staphylococcus epidermidis (strain ATCC 35984 / RP62A) OX=176279 GN=rnr PE=3 SV=1 xxxxx	0	0	0	1	0	1	0	0	0	0	0	0	0	0	1	0	0
Reverse_sp|Q5HK07|SYS - Serine--tRNA ligase OS=Staphylococcus epidermidis (strain ATCC 35984 / RP62A) OX=176279 GN=serS PE=3 SV=1 xxxxx	0	0	0	0	0	0	0	0	0	2	0	0	0	0	1	0	0
Reverse_sp|Q5HMD3|CLS - Cardiolipin synthase 2 OS=Staphylococcus epidermidis (strain ATCC 35984 / RP62A) OX=176279 GN=cls2 PE=3 SV=1 xxxxx	0	0	1	0	0	0	0	0	0	2	0	0	0	0	0	0	0
tr|Q5HN77|Q5HN77_STAE - Amino acid ABC transporter, permease/amino acid-binding protein, putative OS=Staphylococcus epidermidis (strain ATCC 35984 / RP62A) OX=176279 GN=SERP1395 PE=3 SV=1 xxxxx	0	0	1	0	0	0	0	0	0	1	0	0	1	0	0	0	0
sp|Q5HM95|PYRG_STAEQ - CTP synthase OS=Staphylococcus epidermidis (strain ATCC 35984 / RP62A) OX=176279 GN=pyrG PE=3 SV=1 xxxxx	0	0	0	0	0	0	0	0	1	1	0	0	1	0	0	0	0
Reverse_sp|Q5HRL0|RPO - DNA-directed RNA polymerase subunit beta OS=Staphylococcus epidermidis (strain ATCC 35984 / RP62A) OX=176279 GN=rpoB PE=3 SV=1 xxxxx	0	0	1	0	0	0	0	0	0	1	0	0	0	0	1	0	0
sp|Q5HPA2|EBH_STAEQ - Extracellular matrix-binding protein ebh OS=Staphylococcus epidermidis (strain ATCC 35984 / RP62A) OX=176279 GN=ebh PE=4 SV=2 xxxxx	0	0	1	0	0	0	0	0	0	1	0	0	1	0	0	0	0
Reverse_tr|Q5HRF3|Q5H - Phosphomevalonate kinase OS=Staphylococcus epidermidis (strain ATCC 35984 / RP62A) OX=176279 GN=SERP0240 PE=4 SV=1 xxxxx	0	1	1	0	0	0	0	0	0	0	0	0	0	0	1	0	0
Reverse_tr|Q5HRI9|Q5H - tRNA-specific adenosine deaminase OS=Staphylococcus epidermidis (strain ATCC 35984 / RP62A) OX=176279 GN=tadA PE=3 SV=1 xxxxx	0	0	0	0	1	1	1	0	0	0	0	0	0	0	0	0	0
sp|Q5HQE4|RF3_STAEQ - Peptide chain release factor 3 OS=Staphylococcus epidermidis (strain ATCC 35984 / RP62A) OX=176279 GN=prfC PE=3 SV=1 xxxxx	0	1	0	0	1	1	0	0	0	0	0	0	0	0	0	0	0
tr|Q5HLK0|Q5HLK0_STAE - Respiratory nitrate reductase, alpha subunit OS=Staphylococcus epidermidis (strain ATCC 35984 / RP62A) OX=176279 GN=narG PE=3 SV=1 xxxxx	0	0	0	0	1	0	0	0	0	0	0	0	1	0	1	0	0
sp|Q5HNM4|RL35_STAEQ - 50S ribosomal protein L35 OS=Staphylococcus epidermidis (strain ATCC 35984 / RP62A) OX=176279 GN=rpmI PE=3 SV=1 xxxxx	0	0	0	0	0	1	0	0	1	0	0	0	0	0	1	0	0
sp|Q5HPJ3|SBCC_STAEQ - Nuclease SbcCD subunit C OS=Staphylococcus epidermidis (strain ATCC 35984 / RP62A) OX=176279 GN=sbcC PE=3 SV=1 xxxxx	0	0	0	0	0	1	0	0	0	0	0	0	1	0	1	0	0
Reverse_tr|Q5HS64|Q5H - Penicillinase repressor OS=Staphylococcus epidermidis (strain ATCC 35984 / RP62A) OX=176279 GN=blaI-2 PE=4 SV=1 xxxxx	0	0	0	0	0	0	0	0	0	0	1	1	0	0	0	0	0
Reverse_sp|Q5HNW5|GRP - Protein GrpE OS=Staphylococcus epidermidis (strain ATCC 35984 / RP62A) OX=176279 GN=grpE PE=3 SV=1 xxxxx	1	0	0	0	0	0	0	0	0	0	1	0	0	0	0	0	0
sp|Q5HRQ5|KPRS_STAEQ - Ribose-phosphate pyrophosphokinase OS=Staphylococcus epidermidis (strain ATCC 35984 / RP62A) OX=176279 GN=prs PE=3 SV=1 xxxxx	0	0	0	1	0	0	0	0	0	0	1	0	0	0	0	0	0
tr|Q5HRG1|Q5HRG1_STAE - Amino acid permease family protein OS=Staphylococcus epidermidis (strain ATCC 35984 / RP62A) OX=176279 GN=SERP0232 PE=4 SV=1 xxxxx	0	0	0	0	0	0	0	0	0	0	2	0	0	0	0	0	0
Reverse_sp|Q5HPH2|TRP - Indole-3-glycerol phosphate synthase OS=Staphylococcus epidermidis (strain ATCC 35984 / RP62A) OX=176279 GN=trpC PE=3 SV=1 xxxxx	1	0	0	1	0	0	0	0	0	0	0	0	0	0	0	0	0
tr|Q5HR94|Q5HR94_STAE - Teichoic acid biosynthesis protein X, putative OS=Staphylococcus epidermidis (strain ATCC 35984 / RP62A) OX=176279 GN=SERP0299 PE=4 SV=1 xxxxx	1	0	0	1	0	0	0	0	0	0	0	0	0	0	0	0	0
tr|Q5HRJ6|Q5HRJ6_STAE - Ribulose-5-phosphate reductase OS=Staphylococcus epidermidis (strain ATCC 35984 / RP62A) OX=176279 GN=tarJ PE=3 SV=1 xxxxx	1	0	0	0	0	0	0	0	0	0	0	1	0	0	0	0	0
sp|Q5HNW6|DNAK_STAEQ - Chaperone protein DnaK OS=Staphylococcus epidermidis (strain ATCC 35984 / RP62A) OX=176279 GN=dnaK PE=3 SV=1 xxxxx	1	0	0	0	0	0	0	0	0	0	0	0	0	0	1	0	0
tr|Q5HLY7|Q5HLY7_STAE - AcrB/AcrD/AcrF family protein OS=Staphylococcus epidermidis (strain ATCC 35984 / RP62A) OX=176279 GN=SERP1843 PE=3 SV=1 xxxxx	1	0	0	0	0	0	0	0	0	0	0	0	1	0	0	0	0
Reverse_tr|Q5HKR2|Q5H - Serine threonine rich antigen OS=Staphylococcus epidermidis (strain ATCC 35984 / RP62A) OX=176279 GN=SERP2281 PE=4 SV=1 xxxxx	1	0	0	0	1	0	0	0	0	0	0	0	0	0	0	0	0
tr|Q5HL04|Q5HL04_STAE - Anaerobic ribonucleoside-triphosphate reductase OS=Staphylococcus epidermidis (strain ATCC 35984 / RP62A) OX=176279 GN=nrdD PE=4 SV=1 xxxxx	0	0	0	0	0	0	0	0	0	1	0	0	0	0	1	0	0
tr|Q5HL43|Q5HL43_STAE - Dihydroorotate dehydrogenase (quinone) OS=Staphylococcus epidermidis (strain ATCC 35984 / RP62A) OX=176279 GN=pyrD PE=3 SV=1 xxxxx	0	0	0	0	0	0	0	0	0	1	0	0	0	0	1	0	0
tr|Q5HK77|Q5HK77_STAE - Uncharacterized protein OS=Staphylococcus epidermidis (strain ATCC 35984 / RP62A) OX=176279 GN=SERP2473 PE=4 SV=1 xxxxx	0	0	1	0	1	0	0	0	0	0	0	0	0	0	0	0	0
Reverse_tr|Q5HLP4|Q5H - Esterase, putative OS=Staphylococcus epidermidis (strain ATCC 35984 / RP62A) OX=176279 GN=SERP1941 PE=4 SV=1 xxxxx	0	0	1	0	0	0	0	0	0	0	0	0	0	0	1	0	0
tr|Q5HL82|Q5HL82_STAE - CapA protein OS=Staphylococcus epidermidis (strain ATCC 35984 / RP62A) OX=176279 GN=capA PE=4 SV=1 xxxxx	0	0	1	0	0	0	0	0	0	0	0	0	0	0	1	0	0
sp|Q5HR71|Y322_STAEQ - Probable transcriptional regulatory protein SERP0322 OS=Staphylococcus epidermidis (strain ATCC 35984 / RP62A) OX=176279 GN=SERP0322 PE=3 SV=1 xxxxx	0	1	1	0	0	0	0	0	0	0	0	0	0	0	0	0	0
Reverse_tr|Q5HK36|Q5H - Rhodanese-like domain protein OS=Staphylococcus epidermidis (strain ATCC 35984 / RP62A) OX=176279 GN=SERP2515 PE=3 SV=1 xxxxx	0	0	1	0	0	0	0	0	0	0	0	0	0	0	1	0	0
sp|Q5HKU2|ARCA_STAEQ - Arginine deiminase OS=Staphylococcus epidermidis (strain ATCC 35984 / RP62A) OX=176279 GN=arcA PE=3 SV=1 xxxxx	0	0	1	0	0	1	0	0	0	0	0	0	0	0	0	0	0
Reverse_tr|Q5HPX8|Q5H - Primosomal protein N' OS=Staphylococcus epidermidis (strain ATCC 35984 / RP62A) OX=176279 GN=priA PE=3 SV=1 xxxxx	0	1	1	0	0	0	0	0	0	0	0	0	0	0	0	0	0
sp|Q5HQW9|UVRA_STAEQ - UvrABC system protein A OS=Staphylococcus epidermidis (strain ATCC 35984 / RP62A) OX=176279 GN=uvrA PE=3 SV=1 xxxxx	0	0	1	0	0	0	0	0	0	0	0	0	0	1	0	0	0
tr|Q5HLB6|Q5HLB6_STAE - Glycine oxidase, putative OS=Staphylococcus epidermidis (strain ATCC 35984 / RP62A) OX=176279 GN=SERP2071 PE=4 SV=1 xxxxx	0	0	0	0	1	1	0	0	0	0	0	0	0	0	0	0	0
tr|Q5HNL4|Q5HNL4_STAE - DNA polymerase I OS=Staphylococcus epidermidis (strain ATCC 35984 / RP62A) OX=176279 GN=polA PE=3 SV=1 xxxxx	0	0	0	0	1	0	1	0	0	0	0	0	0	0	0	0	0
Reverse_sp|Q5HRV7|Y08 - UPF0753 protein SERP0085 OS=Staphylococcus epidermidis (strain ATCC 35984 / RP62A) OX=176279 GN=SERP0085 PE=3 SV=1 xxxxx	0	0	0	0	1	0	0	0	0	0	0	0	0	0	1	0	0
sp|Q5HR16|LTAS_STAEQ - Lipoteichoic acid synthase OS=Staphylococcus epidermidis (strain ATCC 35984 / RP62A) OX=176279 GN=ltaS PE=3 SV=1 xxxxx	0	0	0	0	1	0	0	0	0	0	0	0	0	0	1	0	0
Reverse_tr|Q5HMI8|Q5H - M23/M37 peptidase domain protein OS=Staphylococcus epidermidis (strain ATCC 35984 / RP62A) OX=176279 GN=SERP1640 PE=4 SV=1 xxxxx	0	0	0	0	1	0	0	0	0	0	0	0	0	0	1	0	0
sp|Q5HM24|RS11_STAEQ - 30S ribosomal protein S11 OS=Staphylococcus epidermidis (strain ATCC 35984 / RP62A) OX=176279 GN=rpsK PE=3 SV=1 xxxxx	0	0	0	0	0	2	0	0	0	0	0	0	0	0	0	0	0
tr|Q5HRP9|Q5HRP9_STAE - S4 domain protein OS=Staphylococcus epidermidis (strain ATCC 35984 / RP62A) OX=176279 GN=SERP0144 PE=4 SV=1 xxxxx	0	0	0	0	0	1	0	0	0	0	0	0	1	0	0	0	0
tr|Q5HK67|Q5HK67_STAE - Uncharacterized protein OS=Staphylococcus epidermidis (strain ATCC 35984 / RP62A) OX=176279 GN=SERP2483 PE=4 SV=1 xxxxx	0	0	0	0	0	1	1	0	0	0	0	0	0	0	0	0	0
tr|Q5HS39|Q5HS39_STAE - Replication-associated protein RepA OS=Staphylococcus epidermidis (strain ATCC 35984 / RP62A) OX=176279 GN=repA PE=4 SV=1 xxxxx	0	0	0	0	0	2	0	0	0	0	0	0	0	0	0	0	0
Reverse_tr|Q5HQ49|Q5H - Uncharacterized protein OS=Staphylococcus epidermidis (strain ATCC 35984 / RP62A) OX=176279 GN=SERP0708 PE=4 SV=1 xxxxx	0	0	0	0	0	2	0	0	0	0	0	0	0	0	0	0	0
Reverse_sp|Q5HLM5|TAG - Teichoic acid poly(glycerol phosphate) polymerase OS=Staphylococcus epidermidis (strain ATCC 35984 / RP62A) OX=176279 GN=tagF PE=1 SV=1 xxxxx	0	0	0	0	0	0	0	0	1	0	0	0	1	0	0	0	0
Reverse_sp|Q5HK04|GYR - DNA gyrase subunit A OS=Staphylococcus epidermidis (strain ATCC 35984 / RP62A) OX=176279 GN=gyrA PE=3 SV=1 xxxxx	0	0	0	0	0	0	0	0	1	0	0	0	0	0	1	0	0
sp|Q5HM06|RL16_STAEQ - 50S ribosomal protein L16 OS=Staphylococcus epidermidis (strain ATCC 35984 / RP62A) OX=176279 GN=rplP PE=3 SV=1 xxxxx	0	0	0	0	0	0	0	0	0	0	0	0	0	0	2	0	0
tr|Q5HKD1|Q5HKD1_STAE - Lipoprotein, putative OS=Staphylococcus epidermidis (strain ATCC 35984 / RP62A) OX=176279 GN=SERP2417 PE=4 SV=1 xxxxx	0	0	0	0	0	0	0	0	0	0	0	1	0	0	1	0	0
Reverse_tr|Q5HQV5|Q5H - Gap transcriptional regulator OS=Staphylococcus epidermidis (strain ATCC 35984 / RP62A) OX=176279 GN=gapR PE=4 SV=1 xxxxx	0	1	0	0	0	0	0	0	0	0	0	0	0	0	1	0	0
tr|Q5HMK9|Q5HMK9_STAE - Uncharacterized protein OS=Staphylococcus epidermidis (strain ATCC 35984 / RP62A) OX=176279 GN=SERP1619 PE=4 SV=1 xxxxx	0	0	0	0	0	0	0	0	0	0	0	0	0	0	2	0	0
tr|Q5HPX1|Q5HPX1_STAE - Serine/threonine protein kinase, putative OS=Staphylococcus epidermidis (strain ATCC 35984 / RP62A) OX=176279 GN=SERP0786 PE=4 SV=1 xxxxx	0	0	0	0	0	0	0	0	0	0	0	1	0	0	1	0	0
tr|Q5HK55|Q5HK55_STAE - Uncharacterized protein OS=Staphylococcus epidermidis (strain ATCC 35984 / RP62A) OX=176279 GN=SERP2496 PE=4 SV=1 xxxxx	0	1	0	0	0	0	0	0	0	0	0	0	0	0	1	0	0
tr|Q5HL39|Q5HL39_STAE - Uncharacterized protein OS=Staphylococcus epidermidis (strain ATCC 35984 / RP62A) OX=176279 GN=SERP2148 PE=4 SV=1 xxxxx	0	0	0	0	0	0	0	0	0	0	0	0	1	1	0	0	0
sp|Q5HRQ2|MFD_STAEQ - Transcription-repair-coupling factor OS=Staphylococcus epidermidis (strain ATCC 35984 / RP62A) OX=176279 GN=mfd PE=3 SV=1 xxxxx	0	0	0	0	0	0	0	0	0	0	0	0	2	0	0	0	0
Reverse_sp|Q5HPY8|CAR - Carbamoyl-phosphate synthase large chain OS=Staphylococcus epidermidis (strain ATCC 35984 / RP62A) OX=176279 GN=carB PE=3 SV=1 xxxxx	0	0	0	0	0	0	0	0	0	0	0	0	0	0	0	0	2
tr|Q5HP73|Q5HP73_STAE - Uncharacterized protein OS=Staphylococcus epidermidis (strain ATCC 35984 / RP62A) OX=176279 GN=SERP1040 PE=4 SV=1 xxxxx	0	0	0	0	0	0	0	0	0	0	1	0	0	0	0	0	0
tr|Q5HMJ4|Q5HMJ4_STAE - Uncharacterized protein OS=Staphylococcus epidermidis (strain ATCC 35984 / RP62A) OX=176279 GN=SERP1634 PE=4 SV=1 xxxxx	0	0	0	0	0	0	0	0	0	0	1	0	0	0	0	0	0
tr|Q5HKX0|Q5HKX0_STAE - Cytosine/purines, uracil, thiamine, allantoin permease family protein OS=Staphylococcus epidermidis (strain ATCC 35984 / RP62A) OX=176279 GN=SERP2217 PE=4 SV=1 xxxxx	0	0	0	0	0	0	0	0	0	0	1	0	0	0	0	0	0
sp|Q5HK97|Y2453_STAEQ - Uncharacterized lipoprotein SERP2453 OS=Staphylococcus epidermidis (strain ATCC 35984 / RP62A) OX=176279 GN=SERP2453 PE=3 SV=1 xxxxx	0	0	0	0	0	0	0	0	0	0	1	0	0	0	0	0	0
tr|Q5HKY8|Q5HKY8_STAE - Uncharacterized protein OS=Staphylococcus epidermidis (strain ATCC 35984 / RP62A) OX=176279 GN=SERP2199 PE=4 SV=1 xxxxx	0	0	0	0	0	0	0	0	0	0	1	0	0	0	0	0	0
sp|Q5HLB4|THIG_STAEQ - Thiazole synthase OS=Staphylococcus epidermidis (strain ATCC 35984 / RP62A) OX=176279 GN=thiG PE=3 SV=1 xxxxx	0	0	0	0	0	0	0	0	0	0	1	0	0	0	0	0	0
Reverse_tr|Q5HP26|Q5H - Acetyl-CoA carboxylase, biotin carboxylase OS=Staphylococcus epidermidis (strain ATCC 35984 / RP62A) OX=176279 GN=accC PE=4 SV=1 xxxxx	0	0	0	0	0	0	0	0	0	0	1	0	0	0	0	0	0
tr|Q5HKX9|Q5HKX9_STAE - Alkaline phosphatase family protein OS=Staphylococcus epidermidis (strain ATCC 35984 / RP62A) OX=176279 GN=SERP2208 PE=3 SV=1 xxxxx	0	0	0	0	0	0	0	0	0	0	1	0	0	0	0	0	0
Reverse_sp|Q5HKP3|HIS - Histidine biosynthesis bifunctional protein HisIE OS=Staphylococcus epidermidis (strain ATCC 35984 / RP62A) OX=176279 GN=hisI PE=3 SV=1 xxxxx	0	0	0	0	0	0	0	0	0	0	1	0	0	0	0	0	0
Reverse_sp|Q5HM25|RPO - DNA-directed RNA polymerase subunit alpha OS=Staphylococcus epidermidis (strain ATCC 35984 / RP62A) OX=176279 GN=rpoA PE=3 SV=1 xxxxx	0	0	0	0	0	0	0	0	0	0	1	0	0	0	0	0	0
tr|Q5HMG8|Q5HMG8_STAE - MutS family protein OS=Staphylococcus epidermidis (strain ATCC 35984 / RP62A) OX=176279 GN=SERP1660 PE=4 SV=1 xxxxx	0	0	0	0	0	0	0	0	0	0	1	0	0	0	0	0	0
Reverse_tr|Q5HRA3|Q5H - ABC transporter, substrate-binding protein OS=Staphylococcus epidermidis (strain ATCC 35984 / RP62A) OX=176279 GN=sitC PE=3 SV=1 xxxxx	0	0	0	0	0	0	0	0	0	0	1	0	0	0	0	0	0
tr|Q5HRN2|Q5HRN2_STAE - Nucleoside permease NupC OS=Staphylococcus epidermidis (strain ATCC 35984 / RP62A) OX=176279 GN=nupC PE=4 SV=1 xxxxx	0	0	0	0	0	0	0	0	0	0	1	0	0	0	0	0	0
Reverse_tr|Q5HPS9|Q5H - Zinc metalloprotease OS=Staphylococcus epidermidis (strain ATCC 35984 / RP62A) OX=176279 GN=SERP0829 PE=3 SV=1 xxxxx	0	0	0	0	0	0	0	0	0	0	1	0	0	0	0	0	0
Reverse_tr|Q5HS04|Q5H - Homocysteine S-methyltransferase/5-methyltetrahydrofolate--homocysteine methyltransferase, putative OS=Staphylococcus epidermidis (strain ATCC 35984 / RP62A) OX=176279 GN=SERP0035 PE=4 SV=1 xxxxx	0	0	0	0	0	0	0	0	0	0	1	0	0	0	0	0	0
Reverse_sp|Q5HP79|ARO - 3-phosphoshikimate 1-carboxyvinyltransferase OS=Staphylococcus epidermidis (strain ATCC 35984 / RP62A) OX=176279 GN=aroA PE=3 SV=1 xxxxx	0	0	0	0	0	0	0	0	0	0	1	0	0	0	0	0	0
Reverse_sp|Q5HQW9|UVR - UvrABC system protein A OS=Staphylococcus epidermidis (strain ATCC 35984 / RP62A) OX=176279 GN=uvrA PE=3 SV=1 xxxxx	0	0	0	0	0	0	0	0	0	0	1	0	0	0	0	0	0
Reverse_sp|Q5HK14|RL9 - 50S ribosomal protein L9 OS=Staphylococcus epidermidis (strain ATCC 35984 / RP62A) OX=176279 GN=rplI PE=3 SV=1 xxxxx	1	0	0	0	0	0	0	0	0	0	0	0	0	0	0	0	0
tr|Q5HK90|Q5HK90_STAE - CRISPR-associated protein, TM1810 family OS=Staphylococcus epidermidis (strain ATCC 35984 / RP62A) OX=176279 GN=SERP2460 PE=4 SV=1 xxxxx	1	0	0	0	0	0	0	0	0	0	0	0	0	0	0	0	0
Reverse_tr|Q5HLJ1|Q5H - Acetyltransferase, GNAT family OS=Staphylococcus epidermidis (strain ATCC 35984 / RP62A) OX=176279 GN=SERP1996 PE=4 SV=1 xxxxx	1	0	0	0	0	0	0	0	0	0	0	0	0	0	0	0	0
Reverse_sp|Q5HQ75|ODP - Pyruvate dehydrogenase E1 component subunit beta OS=Staphylococcus epidermidis (strain ATCC 35984 / RP62A) OX=176279 GN=pdhB PE=3 SV=1 xxxxx	1	0	0	0	0	0	0	0	0	0	0	0	0	0	0	0	0
sp|Q5HN41|FTN_STAEQ - Bacterial non-heme ferritin OS=Staphylococcus epidermidis (strain ATCC 35984 / RP62A) OX=176279 GN=ftnA PE=3 SV=1 xxxxx	1	0	0	0	0	0	0	0	0	0	0	0	0	0	0	0	0
sp|Q5HNH6|SYY_STAEQ - Tyrosine--tRNA ligase OS=Staphylococcus epidermidis (strain ATCC 35984 / RP62A) OX=176279 GN=tyrS PE=3 SV=1 xxxxx	1	0	0	0	0	0	0	0	0	0	0	0	0	0	0	0	0
sp|Q5HLK6|NREC_STAEQ - Oxygen regulatory protein NreC OS=Staphylococcus epidermidis (strain ATCC 35984 / RP62A) OX=176279 GN=nreC PE=3 SV=1 xxxxx	1	0	0	0	0	0	0	0	0	0	0	0	0	0	0	0	0
tr|Q5HLF6|Q5HLF6_STAE - Amino acid ABC transporter, ATP-binding protein OS=Staphylococcus epidermidis (strain ATCC 35984 / RP62A) OX=176279 GN=SERP2031 PE=4 SV=1 xxxxx	1	0	0	0	0	0	0	0	0	0	0	0	0	0	0	0	0
sp|Q5HQV0|ENO_STAEQ - Enolase OS=Staphylococcus epidermidis (strain ATCC 35984 / RP62A) OX=176279 GN=eno PE=3 SV=1 xxxxx	1	0	0	0	0	0	0	0	0	0	0	0	0	0	0	0	0
Reverse_tr|Q5HMY0|Q5H - Sucrose-6-phosphate hydrolase OS=Staphylococcus epidermidis (strain ATCC 35984 / RP62A) OX=176279 GN=cscA PE=3 SV=1 xxxxx	1	0	0	0	0	0	0	0	0	0	0	0	0	0	0	0	0
Reverse_tr|Q5HRI5|Q5H - Glycosyl transferase, group 1 family protein OS=Staphylococcus epidermidis (strain ATCC 35984 / RP62A) OX=176279 GN=SERP0208 PE=4 SV=1 xxxxx	1	0	0	0	0	0	0	0	0	0	0	0	0	0	0	0	0
tr|Q5HPN5|Q5HPN5_STAE - GTPase HflX OS=Staphylococcus epidermidis (strain ATCC 35984 / RP62A) OX=176279 GN=hflX PE=3 SV=1 xxxxx	1	0	0	0	0	0	0	0	0	0	0	0	0	0	0	0	0
tr|Q5HKR5|Q5HKR5_STAE - Uncharacterized protein OS=Staphylococcus epidermidis (strain ATCC 35984 / RP62A) OX=176279 GN=SERP2278 PE=4 SV=1 xxxxx	1	0	0	0	0	0	0	0	0	0	0	0	0	0	0	0	0
Reverse_tr|Q5HKZ6|Q5H - Sulfite reductase [NADPH] flavoprotein alpha-component OS=Staphylococcus epidermidis (strain ATCC 35984 / RP62A) OX=176279 GN=cysJ PE=4 SV=1 xxxxx	1	0	0	0	0	0	0	0	0	0	0	0	0	0	0	0	0
Reverse_tr|Q5HKF4|Q5H - Cell wall associated biofilm protein OS=Staphylococcus epidermidis (strain ATCC 35984 / RP62A) OX=176279 GN=bhp PE=4 SV=1 xxxxx	1	0	0	0	0	0	0	0	0	0	0	0	0	0	0	0	0
tr|Q5HQP5|Q5HQP5_STAE - Uncharacterized protein OS=Staphylococcus epidermidis (strain ATCC 35984 / RP62A) OX=176279 GN=SERP0503 PE=4 SV=1 xxxxx	0	0	0	1	0	0	0	0	0	0	0	0	0	0	0	0	0
Reverse_tr|Q5HL57|Q5H - Uncharacterized protein OS=Staphylococcus epidermidis (strain ATCC 35984 / RP62A) OX=176279 GN=SERP2130 PE=4 SV=1 xxxxx	0	0	0	1	0	0	0	0	0	0	0	0	0	0	0	0	0
sp|Q5HNQ4|RL21_STAEQ - 50S ribosomal protein L21 OS=Staphylococcus epidermidis (strain ATCC 35984 / RP62A) OX=176279 GN=rplU PE=3 SV=1 xxxxx	0	0	0	1	0	0	0	0	0	0	0	0	0	0	0	0	0
Reverse_tr|Q5HP72|Q5H - DNA-binding protein HU OS=Staphylococcus epidermidis (strain ATCC 35984 / RP62A) OX=176279 GN=hup PE=3 SV=1 xxxxx	0	0	0	1	0	0	0	0	0	0	0	0	0	0	0	0	0
tr|Q5HNP4|Q5HNP4_STAE - Tn554, transposase C OS=Staphylococcus epidermidis (strain ATCC 35984 / RP62A) OX=176279 GN=tnpC-1 PE=4 SV=1 xxxxx	0	0	0	1	0	0	0	0	0	0	0	0	0	0	0	0	0
sp|Q5HR02|QUEF_STAEQ - NADPH-dependent 7-cyano-7-deazaguanine reductase OS=Staphylococcus epidermidis (strain ATCC 35984 / RP62A) OX=176279 GN=queF PE=3 SV=1 xxxxx	0	0	0	1	0	0	0	0	0	0	0	0	0	0	0	0	0
Reverse_sp|Q5HQL4|MNH - Na(+)/H(+) antiporter subunit E1 OS=Staphylococcus epidermidis (strain ATCC 35984 / RP62A) OX=176279 GN=mnhE1 PE=3 SV=1 xxxxx	0	0	0	1	0	0	0	0	0	0	0	0	0	0	0	0	0
tr|Q5HQG3|Q5HQG3_STAE - GTP pyrophosphokinase OS=Staphylococcus epidermidis (strain ATCC 35984 / RP62A) OX=176279 GN=relA-1 PE=4 SV=1 xxxxx	0	0	0	1	0	0	0	0	0	0	0	0	0	0	0	0	0
Reverse_tr|Q5HRU3|Q5H - Lipoprotein OS=Staphylococcus epidermidis (strain ATCC 35984 / RP62A) OX=176279 GN=SERP0099 PE=3 SV=1 xxxxx	0	0	0	1	0	0	0	0	0	0	0	0	0	0	0	0	0
sp|Q5HPT2|RRF_STAEQ - Ribosome-recycling factor OS=Staphylococcus epidermidis (strain ATCC 35984 / RP62A) OX=176279 GN=frr PE=3 SV=1 xxxxx	0	0	0	1	0	0	0	0	0	0	0	0	0	0	0	0	0
tr|Q5HKK7|Q5HKK7_STAE - 4-phosphopantetheinyl transferase family protein OS=Staphylococcus epidermidis (strain ATCC 35984 / RP62A) OX=176279 GN=SERP2337 PE=3 SV=1 xxxxx	0	0	0	1	0	0	0	0	0	0	0	0	0	0	0	0	0
tr|Q5HN72|Q5HN72_STAE - Bacterioferritin comigratory protein OS=Staphylococcus epidermidis (strain ATCC 35984 / RP62A) OX=176279 GN=bcp PE=4 SV=1 xxxxx	0	0	0	1	0	0	0	0	0	0	0	0	0	0	0	0	0
tr|Q5HNQ2|Q5HNQ2_STAE - Cell shape-determining protein MreC OS=Staphylococcus epidermidis (strain ATCC 35984 / RP62A) OX=176279 GN=mreC PE=3 SV=1 xxxxx	0	0	0	1	0	0	0	0	0	0	0	0	0	0	0	0	0
sp|Q5HN46|MAP1_STAEQ - Methionine aminopeptidase OS=Staphylococcus epidermidis (strain ATCC 35984 / RP62A) OX=176279 GN=map PE=3 SV=1 xxxxx	0	0	0	1	0	0	0	0	0	0	0	0	0	0	0	0	0
sp|Q5HRJ8|ILVE_STAEQ - Probable branched-chain-amino-acid aminotransferase OS=Staphylococcus epidermidis (strain ATCC 35984 / RP62A) OX=176279 GN=ilvE PE=3 SV=1 xxxxx	0	0	0	1	0	0	0	0	0	0	0	0	0	0	0	0	0
Reverse_sp|Q5HME0|CSH - DEAD-box ATP-dependent RNA helicase CshA OS=Staphylococcus epidermidis (strain ATCC 35984 / RP62A) OX=176279 GN=cshA PE=3 SV=1 xxxxx	0	0	0	1	0	0	0	0	0	0	0	0	0	0	0	0	0
tr|Q5HKS3|Q5HKS3_STAE - Uncharacterized protein OS=Staphylococcus epidermidis (strain ATCC 35984 / RP62A) OX=176279 GN=SERP2269 PE=4 SV=1 xxxxx	0	0	0	1	0	0	0	0	0	0	0	0	0	0	0	0	0
tr|Q5HLX0|Q5HLX0_STAE - Molybdenum ABC transporter, molybdenum-binding protein ModA OS=Staphylococcus epidermidis (strain ATCC 35984 / RP62A) OX=176279 GN=modA PE=4 SV=1 xxxxx	0	0	0	1	0	0	0	0	0	0	0	0	0	0	0	0	0
tr|Q5HQP0|Q5HQP0_STAE - Uncharacterized protein OS=Staphylococcus epidermidis (strain ATCC 35984 / RP62A) OX=176279 GN=SERP0508 PE=4 SV=1 xxxxx	0	0	0	1	0	0	0	0	0	0	0	0	0	0	0	0	0
sp|Q5HQI9|CDR_STAEQ - Coenzyme A disulfide reductase OS=Staphylococcus epidermidis (strain ATCC 35984 / RP62A) OX=176279 GN=cdr PE=3 SV=1 xxxxx	0	0	0	1	0	0	0	0	0	0	0	0	0	0	0	0	0
tr|Q5HQW5|Q5HQW5_STAE - YvcD protein OS=Staphylococcus epidermidis (strain ATCC 35984 / RP62A) OX=176279 GN=yvcD PE=4 SV=1 xxxxx	0	0	0	1	0	0	0	0	0	0	0	0	0	0	0	0	0
Reverse_tr|Q5HM71|Q5H - Lytic regulatory protein, putative OS=Staphylococcus epidermidis (strain ATCC 35984 / RP62A) OX=176279 GN=SERP1758 PE=4 SV=1 xxxxx	0	0	0	1	0	0	0	0	0	0	0	0	0	0	0	0	0
tr|Q5HL66|Q5HL66_STAE - 3-hydroxy-3-methylglutaryl coenzyme A reductase OS=Staphylococcus epidermidis (strain ATCC 35984 / RP62A) OX=176279 GN=SERP2121 PE=3 SV=1 xxxxx	0	0	0	1	0	0	0	0	0	0	0	0	0	0	0	0	0
Reverse_tr|Q5HPJ6|Q5H - IS256-like transposase OS=Staphylococcus epidermidis (strain ATCC 35984 / RP62A) OX=176279 GN=SERP0915 PE=4 SV=1 xxxxx	0	0	0	1	0	0	0	0	0	0	0	0	0	0	0	0	0
sp|Q5HQV1|GPMI_STAEQ - 2,3-bisphosphoglycerate-independent phosphoglycerate mutase OS=Staphylococcus epidermidis (strain ATCC 35984 / RP62A) OX=176279 GN=gpmI PE=3 SV=1 xxxxx	0	0	0	1	0	0	0	0	0	0	0	0	0	0	0	0	0
Reverse_sp|Q5HPU2|TOP - DNA topoisomerase 1 OS=Staphylococcus epidermidis (strain ATCC 35984 / RP62A) OX=176279 GN=topA PE=3 SV=1 xxxxx	0	0	0	1	0	0	0	0	0	0	0	0	0	0	0	0	0
Reverse_sp|Q5HR16|LTA - Lipoteichoic acid synthase OS=Staphylococcus epidermidis (strain ATCC 35984 / RP62A) OX=176279 GN=ltaS PE=3 SV=1 xxxxx	0	0	0	1	0	0	0	0	0	0	0	0	0	0	0	0	0
sp|Q5HK04|GYRA_STAEQ - DNA gyrase subunit A OS=Staphylococcus epidermidis (strain ATCC 35984 / RP62A) OX=176279 GN=gyrA PE=3 SV=1 xxxxx	0	0	0	1	0	0	0	0	0	0	0	0	0	0	0	0	0
tr|Q5HL57|Q5HL57_STAE - Uncharacterized protein OS=Staphylococcus epidermidis (strain ATCC 35984 / RP62A) OX=176279 GN=SERP2130 PE=4 SV=1 xxxxx	0	0	0	0	0	0	0	0	0	1	0	0	0	0	0	0	0
tr|Q5HNI3|Q5HNI3_STAE - OsmC/Ohr family protein OS=Staphylococcus epidermidis (strain ATCC 35984 / RP62A) OX=176279 GN=SERP1286 PE=4 SV=1 xxxxx	0	0	0	0	0	0	0	0	0	1	0	0	0	0	0	0	0
Reverse_tr|Q5HQ86|Q5H - Phosphocarrier protein HPr OS=Staphylococcus epidermidis (strain ATCC 35984 / RP62A) OX=176279 GN=ptsH PE=4 SV=1 xxxxx	0	0	0	0	0	0	0	0	0	1	0	0	0	0	0	0	0
Reverse_sp|Q5HPI7|PLS - Glycerol-3-phosphate acyltransferase OS=Staphylococcus epidermidis (strain ATCC 35984 / RP62A) OX=176279 GN=plsY PE=3 SV=1 xxxxx	0	0	0	0	0	0	0	0	0	1	0	0	0	0	0	0	0
tr|Q5HKY2|Q5HKY2_STAE - Sensor histidine kinase, putative OS=Staphylococcus epidermidis (strain ATCC 35984 / RP62A) OX=176279 GN=SERP2205 PE=4 SV=1 xxxxx	0	0	0	0	0	0	0	0	0	1	0	0	0	0	0	0	0
Reverse_sp|Q5HRM1|TRM - Putative TrmH family tRNA/rRNA methyltransferase OS=Staphylococcus epidermidis (strain ATCC 35984 / RP62A) OX=176279 GN=SERP0172 PE=3 SV=1 xxxxx	0	0	0	0	0	0	0	0	0	1	0	0	0	0	0	0	0
tr|Q5HQ49|Q5HQ49_STAE - Uncharacterized protein OS=Staphylococcus epidermidis (strain ATCC 35984 / RP62A) OX=176279 GN=SERP0708 PE=4 SV=1 xxxxx	0	0	0	0	0	0	0	0	0	1	0	0	0	0	0	0	0
Reverse_tr|Q5HLQ8|Q5H - Uncharacterized protein OS=Staphylococcus epidermidis (strain ATCC 35984 / RP62A) OX=176279 GN=SERP1925 PE=4 SV=1 xxxxx	0	0	0	0	0	0	0	0	0	1	0	0	0	0	0	0	0
Reverse_tr|Q5HKG2|Q5H - ABC transporter, substrate-binding protein OS=Staphylococcus epidermidis (strain ATCC 35984 / RP62A) OX=176279 GN=SERP2383 PE=3 SV=1 xxxxx	0	0	0	0	0	0	0	0	0	1	0	0	0	0	0	0	0
sp|Q5HL31|LDH_STAEQ - L-lactate dehydrogenase OS=Staphylococcus epidermidis (strain ATCC 35984 / RP62A) OX=176279 GN=ldh PE=3 SV=1 xxxxx	0	0	0	0	0	0	0	0	0	1	0	0	0	0	0	0	0
tr|Q5HM71|Q5HM71_STAE - Lytic regulatory protein, putative OS=Staphylococcus epidermidis (strain ATCC 35984 / RP62A) OX=176279 GN=SERP1758 PE=4 SV=1 xxxxx	0	0	0	0	0	0	0	0	0	1	0	0	0	0	0	0	0
tr|Q5HR30|Q5HR30_STAE - Glycosyl transferase, group 2 family protein OS=Staphylococcus epidermidis (strain ATCC 35984 / RP62A) OX=176279 GN=SERP0363 PE=4 SV=1 xxxxx	0	0	0	0	0	0	0	0	0	1	0	0	0	0	0	0	0
Reverse_tr|Q5HRQ0|Q5H - Tetrapyrrole methylase family protein OS=Staphylococcus epidermidis (strain ATCC 35984 / RP62A) OX=176279 GN=SERP0143 PE=4 SV=1 xxxxx	0	0	0	0	0	0	0	0	0	1	0	0	0	0	0	0	0
tr|Q5HL40|Q5HL40_STAE - Epoxyqueuosine reductase QueH OS=Staphylococcus epidermidis (strain ATCC 35984 / RP62A) OX=176279 GN=queH PE=3 SV=1 xxxxx	0	0	0	0	0	0	0	0	0	1	0	0	0	0	0	0	0
sp|Q5HNN3|HEM3_STAEQ - Porphobilinogen deaminase OS=Staphylococcus epidermidis (strain ATCC 35984 / RP62A) OX=176279 GN=hemC PE=3 SV=1 xxxxx	0	0	0	0	0	0	0	0	0	1	0	0	0	0	0	0	0
tr|Q5HQG9|Q5HQG9_STAE - Oligoendopeptidase F OS=Staphylococcus epidermidis (strain ATCC 35984 / RP62A) OX=176279 GN=pepF PE=3 SV=1 xxxxx	0	0	0	0	0	0	0	0	0	1	0	0	0	0	0	0	0
Reverse_sp|Q5HK03|GYR - DNA gyrase subunit B OS=Staphylococcus epidermidis (strain ATCC 35984 / RP62A) OX=176279 GN=gyrB PE=3 SV=1 xxxxx	0	0	0	0	0	0	0	0	0	1	0	0	0	0	0	0	0
tr|Q5HLH7|Q5HLH7_STAE - Uncharacterized protein OS=Staphylococcus epidermidis (strain ATCC 35984 / RP62A) OX=176279 GN=SERP2010 PE=4 SV=1 xxxxx	0	0	0	0	0	0	0	0	0	1	0	0	0	0	0	0	0
Reverse_sp|Q5HQJ4|ADD - ATP-dependent helicase/nuclease subunit A OS=Staphylococcus epidermidis (strain ATCC 35984 / RP62A) OX=176279 GN=addA PE=3 SV=1 xxxxx	0	0	0	0	0	0	0	0	0	1	0	0	0	0	0	0	0
Reverse_sp|Q5HNQ4|RL2 - 50S ribosomal protein L21 OS=Staphylococcus epidermidis (strain ATCC 35984 / RP62A) OX=176279 GN=rplU PE=3 SV=1 xxxxx	0	0	1	0	0	0	0	0	0	0	0	0	0	0	0	0	0
Reverse_tr|Q5HL97|Q5H - Phosphinothricin acetyltransferase, putative OS=Staphylococcus epidermidis (strain ATCC 35984 / RP62A) OX=176279 GN=SERP2090 PE=4 SV=1 xxxxx	0	0	1	0	0	0	0	0	0	0	0	0	0	0	0	0	0
tr|Q5HLE7|Q5HLE7_STAE - Abortive infection family protein OS=Staphylococcus epidermidis (strain ATCC 35984 / RP62A) OX=176279 GN=SERP2040 PE=4 SV=1 xxxxx	0	0	1	0	0	0	0	0	0	0	0	0	0	0	0	0	0
Reverse_sp|Q5HLX8|MOA - Molybdopterin synthase catalytic subunit OS=Staphylococcus epidermidis (strain ATCC 35984 / RP62A) OX=176279 GN=moaE PE=3 SV=1 xxxxx	0	0	1	0	0	0	0	0	0	0	0	0	0	0	0	0	0
Reverse_tr|Q5HKV6|Q5H - Uncharacterized protein OS=Staphylococcus epidermidis (strain ATCC 35984 / RP62A) OX=176279 GN=SERP2234 PE=4 SV=1 xxxxx	0	0	1	0	0	0	0	0	0	0	0	0	0	0	0	0	0
Reverse_tr|Q5HQ77|Q5H - Uncharacterized protein OS=Staphylococcus epidermidis (strain ATCC 35984 / RP62A) OX=176279 GN=SERP0679 PE=4 SV=1 xxxxx	0	0	1	0	0	0	0	0	0	0	0	0	0	0	0	0	0
tr|Q5HK11|Q5HK11_STAE - Homoserine O-acetyltransferase, putative OS=Staphylococcus epidermidis (strain ATCC 35984 / RP62A) OX=176279 GN=SERP2541 PE=3 SV=1 xxxxx	0	0	1	0	0	0	0	0	0	0	0	0	0	0	0	0	0
Reverse_sp|Q5HQ05|POL - Polyphenol oxidase OS=Staphylococcus epidermidis (strain ATCC 35984 / RP62A) OX=176279 GN=SERP0752 PE=3 SV=1 xxxxx	0	0	1	0	0	0	0	0	0	0	0	0	0	0	0	0	0
Reverse_tr|Q5HMV2|Q5H - Uncharacterized protein OS=Staphylococcus epidermidis (strain ATCC 35984 / RP62A) OX=176279 GN=SERP1526 PE=4 SV=1 xxxxx	0	0	1	0	0	0	0	0	0	0	0	0	0	0	0	0	0
tr|Q5HMW5|Q5HMW5_STAE - HNH endonuclease family protein OS=Staphylococcus epidermidis (strain ATCC 35984 / RP62A) OX=176279 GN=SERP1512 PE=4 SV=1 xxxxx	0	0	1	0	0	0	0	0	0	0	0	0	0	0	0	0	0
Reverse_tr|Q5HR82|Q5H - Uncharacterized protein OS=Staphylococcus epidermidis (strain ATCC 35984 / RP62A) OX=176279 GN=SERP0311 PE=4 SV=1 xxxxx	0	0	1	0	0	0	0	0	0	0	0	0	0	0	0	0	0
sp|Q5HLN7|TCAA_STAEQ - Membrane-associated protein TcaA OS=Staphylococcus epidermidis (strain ATCC 35984 / RP62A) OX=176279 GN=tcaA PE=3 SV=1 xxxxx	0	0	1	0	0	0	0	0	0	0	0	0	0	0	0	0	0
tr|Q5HNV0|Q5HNV0_STAE - GTP-binding protein, putative OS=Staphylococcus epidermidis (strain ATCC 35984 / RP62A) OX=176279 GN=SERP1164 PE=4 SV=1 xxxxx	0	0	1	0	0	0	0	0	0	0	0	0	0	0	0	0	0
tr|Q5HKJ4|Q5HKJ4_STAE - Ornithine carbamoyltransferase OS=Staphylococcus epidermidis (strain ATCC 35984 / RP62A) OX=176279 GN=arcB-2 PE=3 SV=1 xxxxx	0	0	1	0	0	0	0	0	0	0	0	0	0	0	0	0	0
tr|Q5HRR6|Q5HRR6_STAE - Ribosomal RNA small subunit methyltransferase I OS=Staphylococcus epidermidis (strain ATCC 35984 / RP62A) OX=176279 GN=rsmI PE=3 SV=1 xxxxx	0	0	1	0	0	0	0	0	0	0	0	0	0	0	0	0	0
Reverse_sp|Q5HL02|CYS - Adenylyl-sulfate kinase OS=Staphylococcus epidermidis (strain ATCC 35984 / RP62A) OX=176279 GN=cysC PE=3 SV=1 xxxxx	0	0	1	0	0	0	0	0	0	0	0	0	0	0	0	0	0
Reverse_tr|Q5HKB4|Q5H - Rhodanese-like domain protein OS=Staphylococcus epidermidis (strain ATCC 35984 / RP62A) OX=176279 GN=SERP2434 PE=3 SV=1 xxxxx	0	0	1	0	0	0	0	0	0	0	0	0	0	0	0	0	0
tr|Q5HNL3|Q5HNL3_STAE - Sensory box histidine kinase PhoR OS=Staphylococcus epidermidis (strain ATCC 35984 / RP62A) OX=176279 GN=phoR PE=4 SV=1 xxxxx	0	0	1	0	0	0	0	0	0	0	0	0	0	0	0	0	0
tr|Q5HN80|Q5HN80_STAE - Epoxyqueuosine reductase OS=Staphylococcus epidermidis (strain ATCC 35984 / RP62A) OX=176279 GN=queG PE=3 SV=1 xxxxx	0	0	1	0	0	0	0	0	0	0	0	0	0	0	0	0	0
tr|Q5HKZ0|Q5HKZ0_STAE - Uncharacterized protein OS=Staphylococcus epidermidis (strain ATCC 35984 / RP62A) OX=176279 GN=SERP2197 PE=4 SV=1 xxxxx	0	0	1	0	0	0	0	0	0	0	0	0	0	0	0	0	0
Reverse_tr|Q5HKF8|Q5H - Lipase OS=Staphylococcus epidermidis (strain ATCC 35984 / RP62A) OX=176279 GN=geh-2 PE=4 SV=1 xxxxx	0	0	1	0	0	0	0	0	0	0	0	0	0	0	0	0	0
tr|Q5HPI2|Q5HPI2_STAE - Uncharacterized protein OS=Staphylococcus epidermidis (strain ATCC 35984 / RP62A) OX=176279 GN=SERP0929 PE=4 SV=1 xxxxx	0	0	1	0	0	0	0	0	0	0	0	0	0	0	0	0	0
sp|Q5HP89|SYN_STAEQ - Asparagine--tRNA ligase OS=Staphylococcus epidermidis (strain ATCC 35984 / RP62A) OX=176279 GN=asnS PE=3 SV=1 xxxxx	0	0	1	0	0	0	0	0	0	0	0	0	0	0	0	0	0
sp|Q5HP13|GCSPA_STAEQ - Probable glycine dehydrogenase (decarboxylating) subunit 1 OS=Staphylococcus epidermidis (strain ATCC 35984 / RP62A) OX=176279 GN=gcvPA PE=3 SV=1 xxxxx	0	0	1	0	0	0	0	0	0	0	0	0	0	0	0	0	0
Reverse_tr|Q5HR95|Q5H - Teichoic acid biosynthesis protein B, putative OS=Staphylococcus epidermidis (strain ATCC 35984 / RP62A) OX=176279 GN=SERP0298 PE=4 SV=1 xxxxx	0	0	1	0	0	0	0	0	0	0	0	0	0	0	0	0	0
tr|Q5HQ26|Q5HQ26_STAE - Succinate dehydrogenase, flavoprotein subunit OS=Staphylococcus epidermidis (strain ATCC 35984 / RP62A) OX=176279 GN=SERP0731 PE=4 SV=1 xxxxx	0	0	1	0	0	0	0	0	0	0	0	0	0	0	0	0	0
Reverse_sp|Q5HL11|BET - Oxygen-dependent choline dehydrogenase OS=Staphylococcus epidermidis (strain ATCC 35984 / RP62A) OX=176279 GN=betA PE=3 SV=1 xxxxx	0	0	1	0	0	0	0	0	0	0	0	0	0	0	0	0	0
sp|Q5HQA1|PURL_STAEQ - Phosphoribosylformylglycinamidine synthase subunit PurL OS=Staphylococcus epidermidis (strain ATCC 35984 / RP62A) OX=176279 GN=purL PE=3 SV=1 xxxxx	0	0	1	0	0	0	0	0	0	0	0	0	0	0	0	0	0
tr|Q5HK15|Q5HK15_STAE - Replicative DNA helicase OS=Staphylococcus epidermidis (strain ATCC 35984 / RP62A) OX=176279 GN=dnaB PE=3 SV=1 xxxxx	0	0	1	0	0	0	0	0	0	0	0	0	0	0	0	0	0
Reverse_tr|Q5HQZ9|Q5H - Ribonucleoside-diphosphate reductase OS=Staphylococcus epidermidis (strain ATCC 35984 / RP62A) OX=176279 GN=nrdE PE=3 SV=1 xxxxx	0	0	1	0	0	0	0	0	0	0	0	0	0	0	0	0	0
Reverse_sp|Q5HPM5|CLS - Cardiolipin synthase 1 OS=Staphylococcus epidermidis (strain ATCC 35984 / RP62A) OX=176279 GN=cls1 PE=3 SV=1 xxxxx	0	0	1	0	0	0	0	0	0	0	0	0	0	0	0	0	0
Reverse_tr|Q5HRP3|Q5H - ATP-dependent zinc metalloprotease FtsH OS=Staphylococcus epidermidis (strain ATCC 35984 / RP62A) OX=176279 GN=ftsH PE=3 SV=1 xxxxx	0	0	1	0	0	0	0	0	0	0	0	0	0	0	0	0	0
sp|Q5HNI8|EZRA_STAEQ - Septation ring formation regulator EzrA OS=Staphylococcus epidermidis (strain ATCC 35984 / RP62A) OX=176279 GN=ezrA PE=3 SV=1 xxxxx	0	0	1	0	0	0	0	0	0	0	0	0	0	0	0	0	0
Reverse_sp|Q5HPS6|RIM - Ribosome maturation factor RimP OS=Staphylococcus epidermidis (strain ATCC 35984 / RP62A) OX=176279 GN=rimP PE=3 SV=1 xxxxx	0	0	0	0	1	0	0	0	0	0	0	0	0	0	0	0	0
Reverse_sp|Q5HRL6|NUS - Transcription termination/antitermination protein NusG OS=Staphylococcus epidermidis (strain ATCC 35984 / RP62A) OX=176279 GN=nusG PE=3 SV=1 xxxxx	0	0	0	0	1	0	0	0	0	0	0	0	0	0	0	0	0
Reverse_sp|Q5HNZ4|FUR - Ferric uptake regulation protein OS=Staphylococcus epidermidis (strain ATCC 35984 / RP62A) OX=176279 GN=fur PE=3 SV=1 xxxxx	0	0	0	0	1	0	0	0	0	0	0	0	0	0	0	0	0
tr|Q5HKL4|Q5HKL4_STAE - Thiamine biosynthesis protein, putative OS=Staphylococcus epidermidis (strain ATCC 35984 / RP62A) OX=176279 GN=SERP2330 PE=4 SV=1 xxxxx	0	0	0	0	1	0	0	0	0	0	0	0	0	0	0	0	0
tr|Q5HRM0|Q5HRM0_STAE - Uncharacterized protein OS=Staphylococcus epidermidis (strain ATCC 35984 / RP62A) OX=176279 GN=SERP0173 PE=4 SV=1 xxxxx	0	0	0	0	1	0	0	0	0	0	0	0	0	0	0	0	0
tr|Q5HMZ8|Q5HMZ8_STAE - ABC transporter, ATP-binding protein OS=Staphylococcus epidermidis (strain ATCC 35984 / RP62A) OX=176279 GN=SERP1477 PE=4 SV=1 xxxxx	0	0	0	0	1	0	0	0	0	0	0	0	0	0	0	0	0
tr|Q5HQK5|Q5HQK5_STAE - ISSep1-like transposase OS=Staphylococcus epidermidis (strain ATCC 35984 / RP62A) OX=176279 GN=SERP0544 PE=4 SV=1 xxxxx	0	0	0	0	1	0	0	0	0	0	0	0	0	0	0	0	0
sp|Q5HKP8|ICAB_STAEQ - Poly-beta-1,6-N-acetyl-D-glucosamine N-deacetylase OS=Staphylococcus epidermidis (strain ATCC 35984 / RP62A) OX=176279 GN=icaB PE=3 SV=1 xxxxx	0	0	0	0	1	0	0	0	0	0	0	0	0	0	0	0	0
sp|Q5HPP0|GLPD_STAEQ - Aerobic glycerol-3-phosphate dehydrogenase OS=Staphylococcus epidermidis (strain ATCC 35984 / RP62A) OX=176279 GN=glpD PE=3 SV=1 xxxxx	0	0	0	0	1	0	0	0	0	0	0	0	0	0	0	0	0
sp|Q5HMB0|GLYA_STAEQ - Serine hydroxymethyltransferase OS=Staphylococcus epidermidis (strain ATCC 35984 / RP62A) OX=176279 GN=glyA PE=3 SV=1 xxxxx	0	0	0	0	1	0	0	0	0	0	0	0	0	0	0	0	0
tr|Q5HRA3|Q5HRA3_STAE - ABC transporter, substrate-binding protein OS=Staphylococcus epidermidis (strain ATCC 35984 / RP62A) OX=176279 GN=sitC PE=3 SV=1 xxxxx	0	0	0	0	1	0	0	0	0	0	0	0	0	0	0	0	0
Reverse_tr|Q5HLV1|Q5H - Na+/H+ antiporter NhaC OS=Staphylococcus epidermidis (strain ATCC 35984 / RP62A) OX=176279 GN=nhaC PE=4 SV=1 xxxxx	0	0	0	0	1	0	0	0	0	0	0	0	0	0	0	0	0
tr|Q5HRI6|Q5HRI6_STAE - SdrG protein OS=Staphylococcus epidermidis (strain ATCC 35984 / RP62A) OX=176279 GN=SERP0207 PE=4 SV=1 xxxxx	0	0	0	0	1	0	0	0	0	0	0	0	0	0	0	0	0
Reverse_sp|Q5HQ85|PT1 - Phosphoenolpyruvate-protein phosphotransferase OS=Staphylococcus epidermidis (strain ATCC 35984 / RP62A) OX=176279 GN=ptsI PE=3 SV=1 xxxxx	0	0	0	0	1	0	0	0	0	0	0	0	0	0	0	0	0
Reverse_tr|Q5HLM8|Q5H - L-lactate permease OS=Staphylococcus epidermidis (strain ATCC 35984 / RP62A) OX=176279 GN=SERP1957 PE=4 SV=1 xxxxx	0	0	0	0	1	0	0	0	0	0	0	0	0	0	0	0	0
sp|Q5HPC4|ARLS_STAEQ - Signal transduction histidine-protein kinase ArlS OS=Staphylococcus epidermidis (strain ATCC 35984 / RP62A) OX=176279 GN=arlS PE=3 SV=1 xxxxx	0	0	0	0	1	0	0	0	0	0	0	0	0	0	0	0	0
sp|Q5HNN9|SYV_STAEQ - Valine--tRNA ligase OS=Staphylococcus epidermidis (strain ATCC 35984 / RP62A) OX=176279 GN=valS PE=3 SV=1 xxxxx	0	0	0	0	1	0	0	0	0	0	0	0	0	0	0	0	0
sp|Q5HL56|COPA_STAEQ - Copper-exporting P-type ATPase OS=Staphylococcus epidermidis (strain ATCC 35984 / RP62A) OX=176279 GN=copA PE=3 SV=1 xxxxx	0	0	0	0	1	0	0	0	0	0	0	0	0	0	0	0	0
tr|Q5HNR4|Q5HNR4_STAE - Protein-export membrane protein SecDF OS=Staphylococcus epidermidis (strain ATCC 35984 / RP62A) OX=176279 GN=secD PE=3 SV=1 xxxxx	0	0	0	0	1	0	0	0	0	0	0	0	0	0	0	0	0
tr|Q5HNF3|Q5HNF3_STAE - Cell wall surface anchor family protein OS=Staphylococcus epidermidis (strain ATCC 35984 / RP62A) OX=176279 GN=SERP1316 PE=4 SV=1 xxxxx	0	0	0	0	1	0	0	0	0	0	0	0	0	0	0	0	0
tr|Q5HR93|Q5HR93_STAE - Glycerol-3-phosphate cytidylyltransferase OS=Staphylococcus epidermidis (strain ATCC 35984 / RP62A) OX=176279 GN=tagD PE=4 SV=1 xxxxx	0	0	0	0	0	0	0	1	0	0	0	0	0	0	0	0	0
Reverse_tr|Q5HNL5|Q5H - Formamidopyrimidine-DNA glycosylase OS=Staphylococcus epidermidis (strain ATCC 35984 / RP62A) OX=176279 GN=fpg PE=3 SV=1 xxxxx	0	0	0	0	0	0	0	1	0	0	0	0	0	0	0	0	0
tr|Q5HNK1|Q5HNK1_STAE - DHH family protein OS=Staphylococcus epidermidis (strain ATCC 35984 / RP62A) OX=176279 GN=SERP1267 PE=4 SV=1 xxxxx	0	0	0	0	0	0	0	1	0	0	0	0	0	0	0	0	0
tr|Q5HKL9|Q5HKL9_STAE - Acetoin dehydrogenase, E1 component, beta subunit OS=Staphylococcus epidermidis (strain ATCC 35984 / RP62A) OX=176279 GN=SERP2325 PE=4 SV=1 xxxxx	0	0	0	0	0	0	0	1	0	0	0	0	0	0	0	0	0
tr|Q5HNH2|Q5HNH2_STAE - Chorismate mutase/phospho-2-dehydro-3-deoxyheptonate aldolase OS=Staphylococcus epidermidis (strain ATCC 35984 / RP62A) OX=176279 GN=SERP1297 PE=4 SV=1 xxxxx	0	0	0	0	0	0	0	1	0	0	0	0	0	0	0	0	0
Reverse_sp|Q5HP14|GCS - Probable glycine dehydrogenase (decarboxylating) subunit 2 OS=Staphylococcus epidermidis (strain ATCC 35984 / RP62A) OX=176279 GN=gcvPB PE=3 SV=1 xxxxx	0	0	0	0	0	0	0	1	0	0	0	0	0	0	0	0	0
sp|Q5HLN0|MQO1_STAEQ - Probable malate:quinone oxidoreductase 1 OS=Staphylococcus epidermidis (strain ATCC 35984 / RP62A) OX=176279 GN=mqo1 PE=3 SV=1 xxxxx	0	0	0	0	0	0	0	1	0	0	0	0	0	0	0	0	0
sp|Q5HPR5|FTSK_STAEQ - DNA translocase FtsK OS=Staphylococcus epidermidis (strain ATCC 35984 / RP62A) OX=176279 GN=ftsK PE=3 SV=1 xxxxx	0	0	0	0	0	0	0	1	0	0	0	0	0	0	0	0	0
tr|Q5HKL7|Q5HKL7_STAE - Dihydrolipoyl dehydrogenase OS=Staphylococcus epidermidis (strain ATCC 35984 / RP62A) OX=176279 GN=SERP2327 PE=3 SV=1 xxxxx	0	0	0	0	0	0	0	1	0	0	0	0	0	0	0	0	0
Reverse_sp|Q5HNT3|Y11 - UPF0297 protein SERP1181 OS=Staphylococcus epidermidis (strain ATCC 35984 / RP62A) OX=176279 GN=SERP1181 PE=3 SV=1 xxxxx	0	0	0	0	0	1	0	0	0	0	0	0	0	0	0	0	0
Reverse_tr|Q5HP08|Q5H - Uncharacterized protein OS=Staphylococcus epidermidis (strain ATCC 35984 / RP62A) OX=176279 GN=SERP1106 PE=4 SV=1 xxxxx	0	0	0	0	0	1	0	0	0	0	0	0	0	0	0	0	0
tr|Q5HRK8|Q5HRK8_STAE - 30S ribosomal protein L7Ae, putative OS=Staphylococcus epidermidis (strain ATCC 35984 / RP62A) OX=176279 GN=SERP0185 PE=4 SV=1 xxxxx	0	0	0	0	0	1	0	0	0	0	0	0	0	0	0	0	0
tr|Q5HL67|Q5HL67_STAE - Secretory antigen SsaA-related protein OS=Staphylococcus epidermidis (strain ATCC 35984 / RP62A) OX=176279 GN=SERP2120 PE=4 SV=1 xxxxx	0	0	0	0	0	1	0	0	0	0	0	0	0	0	0	0	0
sp|Q5HLX4|MOAB_STAEQ - Molybdenum cofactor biosynthesis protein B OS=Staphylococcus epidermidis (strain ATCC 35984 / RP62A) OX=176279 GN=moaB PE=3 SV=1 xxxxx	0	0	0	0	0	1	0	0	0	0	0	0	0	0	0	0	0
sp|Q5HPV8|RNC_STAEQ - Ribonuclease 3 OS=Staphylococcus epidermidis (strain ATCC 35984 / RP62A) OX=176279 GN=rnc PE=3 SV=1 xxxxx	0	0	0	0	0	1	0	0	0	0	0	0	0	0	0	0	0
Reverse_tr|Q5HLH4|Q5H - Uncharacterized protein OS=Staphylococcus epidermidis (strain ATCC 35984 / RP62A) OX=176279 GN=SERP2013 PE=4 SV=1 xxxxx	0	0	0	0	0	1	0	0	0	0	0	0	0	0	0	0	0
tr|Q5HS06|Q5HS06_STAE - Cyclase, putative OS=Staphylococcus epidermidis (strain ATCC 35984 / RP62A) OX=176279 GN=SERP0033 PE=4 SV=1 xxxxx	0	0	0	0	0	1	0	0	0	0	0	0	0	0	0	0	0
Reverse_tr|Q5HNC1|Q5H - ISSep1-like transposase OS=Staphylococcus epidermidis (strain ATCC 35984 / RP62A) OX=176279 GN=SERP1348 PE=4 SV=1 xxxxx	0	0	0	0	0	1	0	0	0	0	0	0	0	0	0	0	0
sp|Q5HL49|ISAA_STAEQ - Probable transglycosylase IsaA OS=Staphylococcus epidermidis (strain ATCC 35984 / RP62A) OX=176279 GN=isaA PE=3 SV=1 xxxxx	0	0	0	0	0	1	0	0	0	0	0	0	0	0	0	0	0
Reverse_tr|Q5HQF8|Q5H - Uncharacterized protein OS=Staphylococcus epidermidis (strain ATCC 35984 / RP62A) OX=176279 GN=SERP0591 PE=4 SV=1 xxxxx	0	0	0	0	0	1	0	0	0	0	0	0	0	0	0	0	0
Reverse_tr|Q5HP87|Q5H - Bifunctional ligase/repressor BirA OS=Staphylococcus epidermidis (strain ATCC 35984 / RP62A) OX=176279 GN=birA PE=3 SV=1 xxxxx	0	0	0	0	0	1	0	0	0	0	0	0	0	0	0	0	0
Reverse_tr|Q5HQ25|Q5H - Succinate dehydrogenase, iron-sulfur protein OS=Staphylococcus epidermidis (strain ATCC 35984 / RP62A) OX=176279 GN=SERP0732 PE=4 SV=1 xxxxx	0	0	0	0	0	1	0	0	0	0	0	0	0	0	0	0	0
Reverse_sp|Q5HPC7|ODO - Dihydrolipoyllysine-residue succinyltransferase component of 2-oxoglutarate dehydrogenase complex OS=Staphylococcus epidermidis (strain ATCC 35984 / RP62A) OX=176279 GN=odhB PE=3 SV=1 xxxxx	0	0	0	0	0	1	0	0	0	0	0	0	0	0	0	0	0
tr|Q5HMY8|Q5HMY8_STAE - SdrH protein OS=Staphylococcus epidermidis (strain ATCC 35984 / RP62A) OX=176279 GN=sdrH PE=4 SV=1 xxxxx	0	0	0	0	0	1	0	0	0	0	0	0	0	0	0	0	0
Reverse_tr|Q5HN22|Q5H - Nicotinate phosphoribosyltransferase OS=Staphylococcus epidermidis (strain ATCC 35984 / RP62A) OX=176279 GN=SERP1450 PE=3 SV=1 xxxxx	0	0	0	0	0	1	0	0	0	0	0	0	0	0	0	0	0
Reverse_sp|Q5HQE7|UGT - Processive diacylglycerol beta-glucosyltransferase OS=Staphylococcus epidermidis (strain ATCC 35984 / RP62A) OX=176279 GN=ugtP PE=3 SV=1 xxxxx	0	0	0	0	0	1	0	0	0	0	0	0	0	0	0	0	0
tr|Q5HNA6|Q5HNA6_STAE - Protoporphyrinogen oxidase OS=Staphylococcus epidermidis (strain ATCC 35984 / RP62A) OX=176279 GN=hemG PE=3 SV=1 xxxxx	0	0	0	0	0	1	0	0	0	0	0	0	0	0	0	0	0
Reverse_sp|Q5HP29|EX7 - Exodeoxyribonuclease 7 large subunit OS=Staphylococcus epidermidis (strain ATCC 35984 / RP62A) OX=176279 GN=xseA PE=3 SV=1 xxxxx	0	0	0	0	0	1	0	0	0	0	0	0	0	0	0	0	0
tr|Q5HRD7|Q5HRD7_STAE - Conserved domain protein OS=Staphylococcus epidermidis (strain ATCC 35984 / RP62A) OX=176279 GN=SERP0256 PE=4 SV=1 xxxxx	0	0	0	0	0	1	0	0	0	0	0	0	0	0	0	0	0
tr|Q5HMH9|Q5HMH9_STAE - Lipase/acylhydrolase domain protein OS=Staphylococcus epidermidis (strain ATCC 35984 / RP62A) OX=176279 GN=SERP1649 PE=4 SV=1 xxxxx	0	0	0	0	0	1	0	0	0	0	0	0	0	0	0	0	0
tr|Q5HQ38|Q5HQ38_STAE - Cell wall surface anchor family protein OS=Staphylococcus epidermidis (strain ATCC 35984 / RP62A) OX=176279 GN=SERP0719 PE=4 SV=1 xxxxx	0	0	0	0	0	1	0	0	0	0	0	0	0	0	0	0	0
Reverse_tr|Q5HMS7|Q5H - Uncharacterized protein OS=Staphylococcus epidermidis (strain ATCC 35984 / RP62A) OX=176279 GN=SERP1551 PE=4 SV=1 xxxxx	0	0	0	0	0	0	0	0	1	0	0	0	0	0	0	0	0
Reverse_tr|Q5HN56|Q5H - Cytosolic long-chain acyl-CoA thioester hydrolase family protein OS=Staphylococcus epidermidis (strain ATCC 35984 / RP62A) OX=176279 GN=SERP1416 PE=4 SV=1 xxxxx	0	0	0	0	0	0	0	0	1	0	0	0	0	0	0	0	0
tr|Q5HQD7|Q5HQD7_STAE - Lipoate--protein ligase OS=Staphylococcus epidermidis (strain ATCC 35984 / RP62A) OX=176279 GN=SERP0616 PE=4 SV=1 xxxxx	0	0	0	0	0	0	0	0	1	0	0	0	0	0	0	0	0
Reverse_sp|Q5HP94|REC - Holliday junction resolvase RecU OS=Staphylococcus epidermidis (strain ATCC 35984 / RP62A) OX=176279 GN=recU PE=3 SV=2 xxxxx	0	0	0	0	0	0	0	0	1	0	0	0	0	0	0	0	0
tr|Q5HMN3|Q5HMN3_STAE - Uncharacterized protein OS=Staphylococcus epidermidis (strain ATCC 35984 / RP62A) OX=176279 GN=SERP1595 PE=4 SV=1 xxxxx	0	0	0	0	0	0	0	0	1	0	0	0	0	0	0	0	0
Reverse_tr|Q5HK95|Q5H - Uncharacterized protein OS=Staphylococcus epidermidis (strain ATCC 35984 / RP62A) OX=176279 GN=SERP2455 PE=4 SV=1 xxxxx	0	0	0	0	0	0	0	0	1	0	0	0	0	0	0	0	0
Reverse_sp|Q5HQ97|PUR - Bifunctional purine biosynthesis protein PurH OS=Staphylococcus epidermidis (strain ATCC 35984 / RP62A) OX=176279 GN=purH PE=3 SV=1 xxxxx	0	0	0	0	0	0	0	0	1	0	0	0	0	0	0	0	0
Reverse_sp|Q5HQB9|ATL - Bifunctional autolysin OS=Staphylococcus epidermidis (strain ATCC 35984 / RP62A) OX=176279 GN=atl PE=3 SV=1 xxxxx	0	0	0	0	0	0	0	0	1	0	0	0	0	0	0	0	0
tr|Q5HPQ9|Q5HPQ9_STAE - Transcriptional regulator, Cro/CI family OS=Staphylococcus epidermidis (strain ATCC 35984 / RP62A) OX=176279 GN=SERP0849 PE=4 SV=1 xxxxx	0	0	0	0	0	0	1	0	0	0	0	0	0	0	0	0	0
sp|Q5HNN6|GSA1_STAEQ - Glutamate-1-semialdehyde 2,1-aminomutase 1 OS=Staphylococcus epidermidis (strain ATCC 35984 / RP62A) OX=176279 GN=hemL1 PE=3 SV=1 xxxxx	0	0	0	0	0	0	1	0	0	0	0	0	0	0	0	0	0
tr|Q5HNZ7|Q5HNZ7_STAE - Penicillin-binding protein 3 OS=Staphylococcus epidermidis (strain ATCC 35984 / RP62A) OX=176279 GN=pbp3 PE=4 SV=1 xxxxx	0	0	0	0	0	0	1	0	0	0	0	0	0	0	0	0	0
sp|Q5HPI1|MPRF_STAEQ - Phosphatidylglycerol lysyltransferase OS=Staphylococcus epidermidis (strain ATCC 35984 / RP62A) OX=176279 GN=mprF PE=3 SV=1 xxxxx	0	0	0	0	0	0	1	0	0	0	0	0	0	0	0	0	0
sp|Q5HPW7|RL28_STAEQ - 50S ribosomal protein L28 OS=Staphylococcus epidermidis (strain ATCC 35984 / RP62A) OX=176279 GN=rpmB PE=3 SV=1 xxxxx	0	0	0	0	0	0	0	0	0	0	0	0	0	0	1	0	0
tr|Q5HM75|Q5HM75_STAE - Uncharacterized protein OS=Staphylococcus epidermidis (strain ATCC 35984 / RP62A) OX=176279 GN=SERP1754 PE=4 SV=1 xxxxx	0	0	0	0	0	0	0	0	0	0	0	0	0	0	1	0	0
sp|Q5HM01|RL23_STAEQ - 50S ribosomal protein L23 OS=Staphylococcus epidermidis (strain ATCC 35984 / RP62A) OX=176279 GN=rplW PE=3 SV=1 xxxxx	0	0	0	0	0	0	0	0	0	0	0	0	0	0	1	0	0
Reverse_sp|Q5HS37|RNP - Ribonuclease P protein component OS=Staphylococcus epidermidis (strain ATCC 35984 / RP62A) OX=176279 GN=rnpA PE=3 SV=1 xxxxx	0	0	0	0	0	0	0	0	0	0	0	0	0	0	1	0	0
Reverse_sp|Q5HQG8|Y58 - UPF0413 protein SERP0581 OS=Staphylococcus epidermidis (strain ATCC 35984 / RP62A) OX=176279 GN=SERP0581 PE=3 SV=1 xxxxx	0	0	0	0	0	0	0	0	0	0	0	0	0	0	1	0	0
tr|Q5HLS0|Q5HLS0_STAE - Uncharacterized protein OS=Staphylococcus epidermidis (strain ATCC 35984 / RP62A) OX=176279 GN=SERP1913 PE=4 SV=1 xxxxx	0	0	0	0	0	0	0	0	0	0	0	0	0	0	1	0	0
sp|Q5HM05|RS3_STAEQ - 30S ribosomal protein S3 OS=Staphylococcus epidermidis (strain ATCC 35984 / RP62A) OX=176279 GN=rpsC PE=3 SV=1 xxxxx	0	0	0	0	0	0	0	0	0	0	0	0	0	0	1	0	0
tr|Q5HQC6|Q5HQC6_STAE - Isochorismate synthase family protein OS=Staphylococcus epidermidis (strain ATCC 35984 / RP62A) OX=176279 GN=SERP0629 PE=4 SV=1 xxxxx	0	0	0	0	0	0	0	0	0	0	0	0	0	0	1	0	0
Reverse_tr|Q5HLV4|Q5H - Staphylococcal accessory regulator Y OS=Staphylococcus epidermidis (strain ATCC 35984 / RP62A) OX=176279 GN=sarY PE=3 SV=1 xxxxx	0	0	0	0	0	0	0	0	0	0	0	0	0	0	1	0	0
Reverse_tr|Q5HNH7|Q5H - Serine protease HtrA, putative OS=Staphylococcus epidermidis (strain ATCC 35984 / RP62A) OX=176279 GN=SERP1292 PE=4 SV=1 xxxxx	0	0	0	0	0	0	0	0	0	0	0	0	0	0	1	0	0
tr|Q5HMA5|Q5HMA5_STAE - Release factor glutamine methyltransferase OS=Staphylococcus epidermidis (strain ATCC 35984 / RP62A) OX=176279 GN=prmC PE=3 SV=1 xxxxx	0	0	0	0	0	0	0	0	0	0	0	0	0	0	1	0	0
tr|Q5HRL9|Q5HRL9_STAE - RNA polymerase sigma factor sigW, putative OS=Staphylococcus epidermidis (strain ATCC 35984 / RP62A) OX=176279 GN=SERP0174 PE=3 SV=1 xxxxx	0	0	0	0	0	0	0	0	0	0	0	0	0	0	1	0	0
tr|Q5HL89|Q5HL89_STAE - Uncharacterized protein OS=Staphylococcus epidermidis (strain ATCC 35984 / RP62A) OX=176279 GN=SERP2098 PE=4 SV=1 xxxxx	0	0	0	0	0	0	0	0	0	0	0	0	0	0	1	0	0
tr|Q5HK05|Q5HK05_STAE - ADP-dependent (S)-NAD(P)H-hydrate dehydratase OS=Staphylococcus epidermidis (strain ATCC 35984 / RP62A) OX=176279 GN=nnrD PE=3 SV=1 xxxxx	0	0	0	0	0	0	0	0	0	0	0	0	0	0	1	0	0
sp|Q5HRX2|IMDH_STAEQ - Inosine-5'-monophosphate dehydrogenase OS=Staphylococcus epidermidis (strain ATCC 35984 / RP62A) OX=176279 GN=guaB PE=3 SV=1 xxxxx	0	0	0	0	0	0	0	0	0	0	0	0	0	0	1	0	0
tr|Q5HNS3|Q5HNS3_STAE - HesA/MoeB/ThiF family protein OS=Staphylococcus epidermidis (strain ATCC 35984 / RP62A) OX=176279 GN=SERP1191 PE=4 SV=1 xxxxx	0	0	0	0	0	0	0	0	0	0	0	0	0	0	1	0	0
tr|Q5HS14|Q5HS14_STAE - Major facilitator family transporter OS=Staphylococcus epidermidis (strain ATCC 35984 / RP62A) OX=176279 GN=SERP0025 PE=4 SV=1 xxxxx	0	0	0	0	0	0	0	0	0	0	0	0	0	0	1	0	0
sp|Q5HPT5|RS2_STAEQ - 30S ribosomal protein S2 OS=Staphylococcus epidermidis (strain ATCC 35984 / RP62A) OX=176279 GN=rpsB PE=3 SV=1 xxxxx	0	0	0	0	0	0	0	0	0	0	0	0	0	0	1	0	0
tr|Q5HP31|Q5HP31_STAE - Geranyltranstransferase OS=Staphylococcus epidermidis (strain ATCC 35984 / RP62A) OX=176279 GN=ispA PE=3 SV=1 xxxxx	0	0	0	0	0	0	0	0	0	0	0	0	0	0	1	0	0
Reverse_tr|Q5HN63|Q5H - ABC transporter, ATP-binding protein OS=Staphylococcus epidermidis (strain ATCC 35984 / RP62A) OX=176279 GN=SERP1409 PE=1 SV=1 xxxxx	0	0	0	0	0	0	0	0	0	0	0	0	0	0	1	0	0
Reverse_sp|Q5HNK4|ACC - Acetyl-coenzyme A carboxylase carboxyl transferase subunit beta OS=Staphylococcus epidermidis (strain ATCC 35984 / RP62A) OX=176279 GN=accD PE=3 SV=1 xxxxx	0	0	0	0	0	0	0	0	0	0	0	0	0	0	1	0	0
Reverse_tr|Q5HRJ6|Q5H - Ribulose-5-phosphate reductase OS=Staphylococcus epidermidis (strain ATCC 35984 / RP62A) OX=176279 GN=tarJ PE=3 SV=1 xxxxx	0	0	0	0	0	0	0	0	0	0	0	0	0	0	1	0	0
Reverse_sp|Q5HPU1|TRM - Methylenetetrahydrofolate--tRNA-(uracil-5-)-methyltransferase TrmFO OS=Staphylococcus epidermidis (strain ATCC 35984 / RP62A) OX=176279 GN=trmFO PE=3 SV=1 xxxxx	0	0	0	0	0	0	0	0	0	0	0	0	0	0	1	0	0
tr|Q5HQE0|Q5HQE0_STAE - 5' nucleotidase family protein OS=Staphylococcus epidermidis (strain ATCC 35984 / RP62A) OX=176279 GN=SERP0613 PE=3 SV=1 xxxxx	0	0	0	0	0	0	0	0	0	0	0	0	0	0	1	0	0
tr|Q5HPZ4|Q5HPZ4_STAE - Pseudouridine synthase OS=Staphylococcus epidermidis (strain ATCC 35984 / RP62A) OX=176279 GN=SERP0763 PE=3 SV=1 xxxxx	0	0	0	0	0	0	0	0	0	0	0	0	0	0	1	0	0
tr|Q5HQG6|Q5HQG6_STAE - Uncharacterized protein OS=Staphylococcus epidermidis (strain ATCC 35984 / RP62A) OX=176279 GN=SERP0583 PE=4 SV=1 xxxxx	0	0	0	0	0	0	0	0	0	0	0	0	0	0	1	0	0
Reverse_tr|Q5HK78|Q5H - Type I restriction-modification system, M subunit OS=Staphylococcus epidermidis (strain ATCC 35984 / RP62A) OX=176279 GN=hsdM PE=4 SV=1 xxxxx	0	0	0	0	0	0	0	0	0	0	0	0	0	0	1	0	0
Reverse_tr|Q5HL28|Q5H - Aminotransferase, class III OS=Staphylococcus epidermidis (strain ATCC 35984 / RP62A) OX=176279 GN=SERP2159 PE=3 SV=1 xxxxx	0	0	0	0	0	0	0	0	0	0	0	0	0	0	1	0	0
tr|Q5HRF9|Q5HRF9_STAE - Membrane protein, putative OS=Staphylococcus epidermidis (strain ATCC 35984 / RP62A) OX=176279 GN=SERP0234 PE=4 SV=1 xxxxx	0	0	0	0	0	0	0	0	0	0	0	0	0	0	1	0	0
tr|Q5HRT6|Q5HRT6_STAE - Uncharacterized protein OS=Staphylococcus epidermidis (strain ATCC 35984 / RP62A) OX=176279 GN=SERP0106 PE=4 SV=1 xxxxx	0	0	0	0	0	0	0	0	0	0	0	0	0	0	1	0	0
sp|Q5HQV4|G3P1_STAEQ - Glyceraldehyde-3-phosphate dehydrogenase 1 OS=Staphylococcus epidermidis (strain ATCC 35984 / RP62A) OX=176279 GN=gapA1 PE=3 SV=1 xxxxx	0	0	0	0	0	0	0	0	0	0	0	0	0	0	1	0	0
Reverse_sp|Q5HNZ1|END - Probable endonuclease 4 OS=Staphylococcus epidermidis (strain ATCC 35984 / RP62A) OX=176279 GN=nfo PE=3 SV=1 xxxxx	0	0	0	0	0	0	0	0	0	0	0	0	0	0	1	0	0
Reverse_tr|Q5HKY9|Q5H - Uncharacterized protein OS=Staphylococcus epidermidis (strain ATCC 35984 / RP62A) OX=176279 GN=SERP2198 PE=4 SV=1 xxxxx	0	0	0	0	0	0	0	0	0	0	0	0	0	0	1	0	0
Reverse_tr|Q5HN87|Q5H - Sensor histidine kinase OS=Staphylococcus epidermidis (strain ATCC 35984 / RP62A) OX=176279 GN=SERP1385 PE=4 SV=1 xxxxx	0	0	0	0	0	0	0	0	0	0	0	0	0	0	1	0	0
Reverse_tr|Q5HN64|Q5H - Uncharacterized protein OS=Staphylococcus epidermidis (strain ATCC 35984 / RP62A) OX=176279 GN=SERP1408 PE=4 SV=1 xxxxx	0	0	0	0	0	0	0	0	0	0	0	0	0	0	1	0	0
Reverse_sp|Q5HN45|Y14 - UPF0421 protein SERP1427 OS=Staphylococcus epidermidis (strain ATCC 35984 / RP62A) OX=176279 GN=SERP1427 PE=3 SV=1 xxxxx	0	0	0	0	0	0	0	0	0	0	0	0	0	0	1	0	0
Reverse_sp|Q5HPI6|PAR - DNA topoisomerase 4 subunit B OS=Staphylococcus epidermidis (strain ATCC 35984 / RP62A) OX=176279 GN=parE PE=3 SV=2 xxxxx	0	0	0	0	0	0	0	0	0	0	0	0	0	0	1	0	0
sp|Q5HLY6|FEMX_STAEQ - Lipid II:glycine glycyltransferase OS=Staphylococcus epidermidis (strain ATCC 35984 / RP62A) OX=176279 GN=femX PE=3 SV=1 xxxxx	0	0	0	0	0	0	0	0	0	0	0	0	0	0	1	0	0
tr|Q5HNL9|Q5HNL9_STAE - Replication initiation and membrane attachment protein OS=Staphylococcus epidermidis (strain ATCC 35984 / RP62A) OX=176279 GN=SERP1248 PE=4 SV=1 xxxxx	0	0	0	0	0	0	0	0	0	0	0	0	0	0	1	0	0
tr|Q5HMK8|Q5HMK8_STAE - Uncharacterized protein OS=Staphylococcus epidermidis (strain ATCC 35984 / RP62A) OX=176279 GN=SERP1620 PE=4 SV=1 xxxxx	0	0	0	0	0	0	0	0	0	0	0	0	0	0	1	0	0
Reverse_tr|Q5HPL5|Q5H - Aspartokinase OS=Staphylococcus epidermidis (strain ATCC 35984 / RP62A) OX=176279 GN=SERP0896 PE=3 SV=1 xxxxx	0	0	0	0	0	0	0	0	0	0	0	0	0	0	1	0	0
sp|Q5HNF1|SYL_STAEQ - Leucine--tRNA ligase OS=Staphylococcus epidermidis (strain ATCC 35984 / RP62A) OX=176279 GN=leuS PE=3 SV=1 xxxxx	0	0	0	0	0	0	0	0	0	0	0	0	0	0	1	0	0
Reverse_tr|Q5HMU0|Q5H - DNA-directed DNA polymerase OS=Staphylococcus epidermidis (strain ATCC 35984 / RP62A) OX=176279 GN=SERP1538 PE=3 SV=1 xxxxx	0	0	0	0	0	0	0	0	0	0	0	0	0	0	1	0	0
sp|Q5HPW5|Y792_STAEQ - Uncharacterized protein SERP0792 OS=Staphylococcus epidermidis (strain ATCC 35984 / RP62A) OX=176279 GN=SERP0792 PE=4 SV=1 xxxxx	0	0	0	0	0	0	0	0	0	0	0	0	0	0	1	0	0
Reverse_sp|Q5HN26|PUR - Adenylosuccinate lyase OS=Staphylococcus epidermidis (strain ATCC 35984 / RP62A) OX=176279 GN=purB PE=3 SV=1 xxxxx	0	0	0	0	0	0	0	0	0	0	0	0	0	0	1	0	0
tr|Q5HPA0|Q5HPA0_STAE - Uncharacterized protein OS=Staphylococcus epidermidis (strain ATCC 35984 / RP62A) OX=176279 GN=SERP1013 PE=4 SV=1 xxxxx	0	0	0	0	0	0	0	0	0	0	0	0	0	0	1	0	0
sp|Q5HK76|HSDR_STAEQ - Type-1 restriction enzyme R protein OS=Staphylococcus epidermidis (strain ATCC 35984 / RP62A) OX=176279 GN=hsdR PE=3 SV=1 xxxxx	0	0	0	0	0	0	0	0	0	0	0	0	0	0	1	0	0
Reverse_sp|Q5HLE0|PPK - Polyphosphate kinase OS=Staphylococcus epidermidis (strain ATCC 35984 / RP62A) OX=176279 GN=ppk PE=3 SV=1 xxxxx	0	0	0	0	0	0	0	0	0	0	0	0	0	0	1	0	0
Reverse_tr|Q5HP59|Q5H - Sensor histidine kinase SrrB OS=Staphylococcus epidermidis (strain ATCC 35984 / RP62A) OX=176279 GN=srrB PE=4 SV=1 xxxxx	0	0	0	0	0	0	0	0	0	0	0	0	0	0	1	0	0
Reverse_sp|Q5HRB2|MNH - Putative antiporter subunit mnhA2 OS=Staphylococcus epidermidis (strain ATCC 35984 / RP62A) OX=176279 GN=mnhA2 PE=3 SV=1 xxxxx	0	0	0	0	0	0	0	0	0	0	0	0	0	0	1	0	0
Reverse_tr|Q5HMI3|Q5H - Uncharacterized protein OS=Staphylococcus epidermidis (strain ATCC 35984 / RP62A) OX=176279 GN=SERP1645 PE=4 SV=1 xxxxx	0	0	0	0	0	0	0	0	0	0	0	0	0	0	1	0	0
Reverse_tr|Q5HNF3|Q5H - Cell wall surface anchor family protein OS=Staphylococcus epidermidis (strain ATCC 35984 / RP62A) OX=176279 GN=SERP1316 PE=4 SV=1 xxxxx	0	0	0	0	0	0	0	0	0	0	0	0	0	0	1	0	0
Reverse_sp|Q5HNA4|DCU - Uroporphyrinogen decarboxylase OS=Staphylococcus epidermidis (strain ATCC 35984 / RP62A) OX=176279 GN=hemE PE=3 SV=1 xxxxx	0	0	0	0	0	0	0	0	0	0	0	0	0	0	0	1	0
sp|Q5HMD3|CLS2_STAEQ - Cardiolipin synthase 2 OS=Staphylococcus epidermidis (strain ATCC 35984 / RP62A) OX=176279 GN=cls2 PE=3 SV=1 xxxxx	0	0	0	0	0	0	0	0	0	0	0	0	0	0	0	1	0
tr|Q5HP37|Q5HP37_STAE - Dihydrolipoamide acetyltransferase component of pyruvate dehydrogenase complex OS=Staphylococcus epidermidis (strain ATCC 35984 / RP62A) OX=176279 GN=SERP1076 PE=3 SV=1 xxxxx	0	0	0	0	0	0	0	0	0	0	0	0	0	0	0	1	0
Reverse_tr|Q5HR11|Q5H - ATP-dependent DNA helicase RecQ OS=Staphylococcus epidermidis (strain ATCC 35984 / RP62A) OX=176279 GN=recQ-1 PE=4 SV=1 xxxxx	0	0	0	0	0	0	0	0	0	0	0	0	0	0	0	1	0
Reverse_sp|Q5HQX0|UVR - UvrABC system protein B OS=Staphylococcus epidermidis (strain ATCC 35984 / RP62A) OX=176279 GN=uvrB PE=3 SV=1 xxxxx	0	0	0	0	0	0	0	0	0	0	0	0	0	0	0	1	0
Reverse_tr|Q5HK61|Q5H - Sensor histidine kinase KdpD OS=Staphylococcus epidermidis (strain ATCC 35984 / RP62A) OX=176279 GN=kdpD PE=4 SV=1 xxxxx	0	0	0	0	0	0	0	0	0	0	0	0	0	0	0	1	0
tr|Q5HNT1|Q5HNT1_STAE - ATP-dependent RecD-like DNA helicase OS=Staphylococcus epidermidis (strain ATCC 35984 / RP62A) OX=176279 GN=recD2 PE=3 SV=1 xxxxx	0	0	0	0	0	0	0	0	0	0	0	0	0	0	0	1	0
tr|Q5HKW4|Q5HKW4_STAE - Metallothionein 2-related protein OS=Staphylococcus epidermidis (strain ATCC 35984 / RP62A) OX=176279 GN=SERP2224 PE=4 SV=1 xxxxx	0	0	0	0	0	0	0	0	0	0	0	0	0	1	0	0	0
sp|Q5HMB6|ATPD_STAEQ - ATP synthase subunit delta OS=Staphylococcus epidermidis (strain ATCC 35984 / RP62A) OX=176279 GN=atpH PE=3 SV=1 xxxxx	0	0	0	0	0	0	0	0	0	0	0	0	0	1	0	0	0
Reverse_sp|Q5HMB9|ATP - ATP synthase subunit beta OS=Staphylococcus epidermidis (strain ATCC 35984 / RP62A) OX=176279 GN=atpD PE=3 SV=1 xxxxx	0	0	0	0	0	0	0	0	0	0	0	0	0	1	0	0	0
Reverse_sp|Q5HKZ7|CYS - Sulfite reductase [NADPH] hemoprotein beta-component OS=Staphylococcus epidermidis (strain ATCC 35984 / RP62A) OX=176279 GN=cysI PE=3 SV=1 xxxxx	0	0	0	0	0	0	0	0	0	0	0	0	0	1	0	0	0
Reverse_tr|Q5HL63|Q5H - Uncharacterized protein OS=Staphylococcus epidermidis (strain ATCC 35984 / RP62A) OX=176279 GN=SERP2124 PE=4 SV=1 xxxxx	0	0	0	0	0	0	0	0	0	0	0	1	0	0	0	0	0
Reverse_tr|Q5HR94|Q5H - Teichoic acid biosynthesis protein X, putative OS=Staphylococcus epidermidis (strain ATCC 35984 / RP62A) OX=176279 GN=SERP0299 PE=4 SV=1 xxxxx	0	0	0	0	0	0	0	0	0	0	0	1	0	0	0	0	0
Reverse_tr|Q5HQB5|Q5H - Transcriptional regulator, putative OS=Staphylococcus epidermidis (strain ATCC 35984 / RP62A) OX=176279 GN=SERP0640 PE=4 SV=1 xxxxx	0	0	0	0	0	0	0	0	0	0	0	1	0	0	0	0	0
Reverse_sp|Q5HRQ6|GLM - Bifunctional protein GlmU OS=Staphylococcus epidermidis (strain ATCC 35984 / RP62A) OX=176279 GN=glmU PE=3 SV=1 xxxxx	0	0	0	0	0	0	0	0	0	0	0	1	0	0	0	0	0
sp|Q5HKR6|SECA2_STAEQ - Protein translocase subunit SecA 2 OS=Staphylococcus epidermidis (strain ATCC 35984 / RP62A) OX=176279 GN=secA2 PE=3 SV=1 xxxxx	0	0	0	0	0	0	0	0	0	0	0	1	0	0	0	0	0
sp|Q5HS05|METE_STAEQ - 5-methyltetrahydropteroyltriglutamate--homocysteine methyltransferase OS=Staphylococcus epidermidis (strain ATCC 35984 / RP62A) OX=176279 GN=metE PE=3 SV=1 xxxxx	0	0	0	0	0	0	0	0	0	0	0	1	0	0	0	0	0
tr|Q5HLD9|Q5HLD9_STAE - Peptidase, M20/M25/M40 family OS=Staphylococcus epidermidis (strain ATCC 35984 / RP62A) OX=176279 GN=SERP2048 PE=4 SV=1 xxxxx	0	0	0	0	0	0	0	0	0	0	0	1	0	0	0	0	0
tr|Q5HKS8|Q5HKS8_STAE - Cell wall surface anchor family protein OS=Staphylococcus epidermidis (strain ATCC 35984 / RP62A) OX=176279 GN=SERP2264 PE=4 SV=1 xxxxx	0	0	0	0	0	0	0	0	0	0	0	1	0	0	0	0	0
tr|Q5HQ55|Q5HQ55_STAE - Uncharacterized protein OS=Staphylococcus epidermidis (strain ATCC 35984 / RP62A) OX=176279 GN=SERP0702 PE=4 SV=1 xxxxx	0	0	0	0	0	0	0	0	0	0	0	0	1	0	0	0	0
tr|Q5HKQ3|Q5HKQ3_STAE - Uncharacterized protein OS=Staphylococcus epidermidis (strain ATCC 35984 / RP62A) OX=176279 GN=SERP2290 PE=4 SV=1 xxxxx	0	0	0	0	0	0	0	0	0	0	0	0	1	0	0	0	0
Reverse_tr|Q5HNU9|Q5H - Hydrolase, HAD-superfamily, subfamily IIIA OS=Staphylococcus epidermidis (strain ATCC 35984 / RP62A) OX=176279 GN=SERP1165 PE=4 SV=1 xxxxx	0	0	0	0	0	0	0	0	0	0	0	0	1	0	0	0	0
tr|Q5HR60|Q5HR60_STAE - Uncharacterized protein OS=Staphylococcus epidermidis (strain ATCC 35984 / RP62A) OX=176279 GN=SERP0333 PE=4 SV=1 xxxxx	0	0	0	0	0	0	0	0	0	0	0	0	1	0	0	0	0
Reverse_tr|Q5HLT7|Q5H - Transcriptional regulator, DeoR family OS=Staphylococcus epidermidis (strain ATCC 35984 / RP62A) OX=176279 GN=SERP1895 PE=4 SV=1 xxxxx	0	0	0	0	0	0	0	0	0	0	0	0	1	0	0	0	0
Reverse_tr|Q5HNY4|Q5H - CBS domain protein OS=Staphylococcus epidermidis (strain ATCC 35984 / RP62A) OX=176279 GN=SERP1130 PE=4 SV=1 xxxxx	0	0	0	0	0	0	0	0	0	0	0	0	1	0	0	0	0
Reverse_sp|Q5HMB5|ATP - ATP synthase subunit b OS=Staphylococcus epidermidis (strain ATCC 35984 / RP62A) OX=176279 GN=atpF PE=3 SV=1 xxxxx	0	0	0	0	0	0	0	0	0	0	0	0	1	0	0	0	0
Reverse_tr|Q5HM52|Q5H - Iron compound ABC transporter, iron compound-binding protein OS=Staphylococcus epidermidis (strain ATCC 35984 / RP62A) OX=176279 GN=SERP1777 PE=4 SV=1 xxxxx	0	0	0	0	0	0	0	0	0	0	0	0	1	0	0	0	0
Reverse_tr|Q5HL67|Q5H - Secretory antigen SsaA-related protein OS=Staphylococcus epidermidis (strain ATCC 35984 / RP62A) OX=176279 GN=SERP2120 PE=4 SV=1 xxxxx	0	0	0	0	0	0	0	0	0	0	0	0	1	0	0	0	0
Reverse_tr|Q5HNP4|Q5H - Tn554, transposase C OS=Staphylococcus epidermidis (strain ATCC 35984 / RP62A) OX=176279 GN=tnpC-1 PE=4 SV=1 xxxxx	0	0	0	0	0	0	0	0	0	0	0	0	1	0	0	0	0
Reverse_sp|Q5HKQ1|ICA - Biofilm operon icaADBC HTH-type negative transcriptional regulator IcaR OS=Staphylococcus epidermidis (strain ATCC 35984 / RP62A) OX=176279 GN=icaR PE=1 SV=1 xxxxx	0	0	0	0	0	0	0	0	0	0	0	0	1	0	0	0	0
tr|Q5HQ60|Q5HQ60_STAE - GTP-binding protein TypA OS=Staphylococcus epidermidis (strain ATCC 35984 / RP62A) OX=176279 GN=SERP0696 PE=4 SV=1 xxxxx	0	0	0	0	0	0	0	0	0	0	0	0	1	0	0	0	0
tr|Q5HN07|Q5HN07_STAE - Tn554-related, transposase A OS=Staphylococcus epidermidis (strain ATCC 35984 / RP62A) OX=176279 GN=SERP1466 PE=3 SV=1 xxxxx	0	0	0	0	0	0	0	0	0	0	0	0	1	0	0	0	0
tr|Q5HL26|Q5HL26_STAE - Lipoprotein, putative OS=Staphylococcus epidermidis (strain ATCC 35984 / RP62A) OX=176279 GN=SERP2161 PE=4 SV=1 xxxxx	0	0	0	0	0	0	0	0	0	0	0	0	1	0	0	0	0
tr|Q5HN94|Q5HN94_STAE - Cmp-binding-factor 1 OS=Staphylococcus epidermidis (strain ATCC 35984 / RP62A) OX=176279 GN=cbf1 PE=4 SV=1 xxxxx	0	0	0	0	0	0	0	0	0	0	0	0	1	0	0	0	0
Reverse_sp|Q5HQN3|NAG - Acid sugar phosphatase OS=Staphylococcus epidermidis (strain ATCC 35984 / RP62A) OX=176279 GN=nagD PE=3 SV=1 xxxxx	0	0	0	0	0	0	0	0	0	0	0	0	1	0	0	0	0
sp|Q5HRS3|KTHY_STAEQ - Thymidylate kinase OS=Staphylococcus epidermidis (strain ATCC 35984 / RP62A) OX=176279 GN=tmk PE=3 SV=1 xxxxx	0	0	0	0	0	0	0	0	0	0	0	0	1	0	0	0	0
Reverse_tr|Q5HNU5|Q5H - Acetyl-CoA carboxylase, biotin carboxylase, putative OS=Staphylococcus epidermidis (strain ATCC 35984 / RP62A) OX=176279 GN=SERP1169 PE=4 SV=1 xxxxx	0	0	0	0	0	0	0	0	0	0	0	0	1	0	0	0	0
sp|Q5HM20|KAD_STAEQ - Adenylate kinase OS=Staphylococcus epidermidis (strain ATCC 35984 / RP62A) OX=176279 GN=adk PE=3 SV=1 xxxxx	0	0	0	0	0	0	0	0	0	0	0	0	1	0	0	0	0
tr|Q5HPA9|Q5HPA9_STAE - ABC transporter, ATP-binding protein OS=Staphylococcus epidermidis (strain ATCC 35984 / RP62A) OX=176279 GN=SERP1004 PE=4 SV=1 xxxxx	0	0	0	0	0	0	0	0	0	0	0	0	1	0	0	0	0
Reverse_tr|Q5HQH7|Q5H - Oligopeptide ABC transporter, ATP-binding protein OppD OS=Staphylococcus epidermidis (strain ATCC 35984 / RP62A) OX=176279 GN=oppD PE=3 SV=1 xxxxx	0	0	0	0	0	0	0	0	0	0	0	0	1	0	0	0	0
Reverse_tr|Q5HRE1|Q5H - Uncharacterized protein OS=Staphylococcus epidermidis (strain ATCC 35984 / RP62A) OX=176279 GN=SERP0252 PE=4 SV=1 xxxxx	0	0	0	0	0	0	0	0	0	0	0	0	1	0	0	0	0
tr|Q5HL61|Q5HL61_STAE - Ferrous iron transport protein B OS=Staphylococcus epidermidis (strain ATCC 35984 / RP62A) OX=176279 GN=feoB PE=3 SV=1 xxxxx	0	0	0	0	0	0	0	0	0	0	0	0	1	0	0	0	0
Reverse_sp|Q5HRF7|PTA - Phosphate acetyltransferase OS=Staphylococcus epidermidis (strain ATCC 35984 / RP62A) OX=176279 GN=pta PE=3 SV=1 xxxxx	0	0	0	0	0	0	0	0	0	0	0	0	1	0	0	0	0
Reverse_sp|Q5HRM5|SYE - Glutamate--tRNA ligase OS=Staphylococcus epidermidis (strain ATCC 35984 / RP62A) OX=176279 GN=gltX PE=3 SV=1 xxxxx	0	0	0	0	0	0	0	0	0	0	0	0	1	0	0	0	0
tr|Q5HKH3|Q5HKH3_STAE - Peptide ABC transporter, peptide-binding protein OS=Staphylococcus epidermidis (strain ATCC 35984 / RP62A) OX=176279 GN=SERP2372 PE=4 SV=1 xxxxx	0	0	0	0	0	0	0	0	0	0	0	0	1	0	0	0	0
Reverse_sp|Q5HN96|PRS - Foldase protein PrsA OS=Staphylococcus epidermidis (strain ATCC 35984 / RP62A) OX=176279 GN=prsA PE=3 SV=1 xxxxx	0	0	0	0	0	0	0	0	0	0	0	0	1	0	0	0	0
tr|Q5HPN0|Q5HPN0_STAE - Uncharacterized protein OS=Staphylococcus epidermidis (strain ATCC 35984 / RP62A) OX=176279 GN=SERP0879 PE=4 SV=1 xxxxx	0	0	0	0	0	0	0	0	0	0	0	0	1	0	0	0	0
tr|Q5HPJ6|Q5HPJ6_STAE - IS256-like transposase OS=Staphylococcus epidermidis (strain ATCC 35984 / RP62A) OX=176279 GN=SERP0915 PE=4 SV=1 xxxxx	0	0	0	0	0	0	0	0	0	0	0	0	1	0	0	0	0
Reverse_tr|Q5HRT5|Q5H - Transcriptional regulatory protein GltC, putative OS=Staphylococcus epidermidis (strain ATCC 35984 / RP62A) OX=176279 GN=SERP0107 PE=4 SV=1 xxxxx	0	0	0	0	0	0	0	0	0	0	0	0	1	0	0	0	0
tr|Q5HPS5|Q5HPS5_STAE - Transcription termination/antitermination protein NusA OS=Staphylococcus epidermidis (strain ATCC 35984 / RP62A) OX=176279 GN=nusA PE=3 SV=1 xxxxx	0	0	0	0	0	0	0	0	0	0	0	0	1	0	0	0	0
Reverse_tr|Q5HMV5|Q5H - DNA-cytosine methyltransferase OS=Staphylococcus epidermidis (strain ATCC 35984 / RP62A) OX=176279 GN=SERP1523 PE=3 SV=1 xxxxx	0	0	0	0	0	0	0	0	0	0	0	0	1	0	0	0	0
sp|Q5HKP1|HIS4_STAEQ - 1-(5-phosphoribosyl)-5-[(5-phosphoribosylamino)methylideneamino] imidazole-4-carboxamide isomerase OS=Staphylococcus epidermidis (strain ATCC 35984 / RP62A) OX=176279 GN=hisA PE=3 SV=1 xxxxx	0	0	0	0	0	0	0	0	0	0	0	0	1	0	0	0	0
Reverse_sp|Q5HLA3|ALD - Putative aldehyde dehydrogenase AldA OS=Staphylococcus epidermidis (strain ATCC 35984 / RP62A) OX=176279 GN=aldA PE=3 SV=1 xxxxx	0	0	0	0	0	0	0	0	0	0	0	0	1	0	0	0	0
Reverse_tr|Q5HPL3|Q5H - Threonine synthase OS=Staphylococcus epidermidis (strain ATCC 35984 / RP62A) OX=176279 GN=thrC PE=3 SV=1 xxxxx	0	0	0	0	0	0	0	0	0	0	0	0	1	0	0	0	0
sp|Q5HN30|DNLJ_STAEQ - DNA ligase OS=Staphylococcus epidermidis (strain ATCC 35984 / RP62A) OX=176279 GN=ligA PE=3 SV=1 xxxxx	0	0	0	0	0	0	0	0	0	0	0	0	1	0	0	0	0
Reverse_tr|Q5HRM6|Q5H - PIN domain protein OS=Staphylococcus epidermidis (strain ATCC 35984 / RP62A) OX=176279 GN=SERP0167 PE=4 SV=1 xxxxx	0	0	0	0	0	0	0	0	0	0	0	0	1	0	0	0	0
tr|Q5HKX7|Q5HKX7_STAE - Glycosyl transferase, group 1 family protein OS=Staphylococcus epidermidis (strain ATCC 35984 / RP62A) OX=176279 GN=SERP2210 PE=4 SV=1 xxxxx	0	0	0	0	0	0	0	0	0	0	0	0	1	0	0	0	0
sp|Q5HQX5|RF2_STAEQ - Peptide chain release factor 2 OS=Staphylococcus epidermidis (strain ATCC 35984 / RP62A) OX=176279 GN=prfB PE=3 SV=1 xxxxx	0	0	0	0	0	0	0	0	0	0	0	0	1	0	0	0	0
Reverse_sp|Q5HN30|DNL - DNA ligase OS=Staphylococcus epidermidis (strain ATCC 35984 / RP62A) OX=176279 GN=ligA PE=3 SV=1 xxxxx	0	0	0	0	0	0	0	0	0	0	0	0	1	0	0	0	0
tr|Q5HLH5|Q5HLH5_STAE - Glycerate kinase 2 OS=Staphylococcus epidermidis (strain ATCC 35984 / RP62A) OX=176279 GN=garK PE=3 SV=1 xxxxx	0	0	0	0	0	0	0	0	0	0	0	0	1	0	0	0	0
sp|Q5HRK5|EFG_STAEQ - Elongation factor G OS=Staphylococcus epidermidis (strain ATCC 35984 / RP62A) OX=176279 GN=fusA PE=3 SV=3 xxxxx	0	0	0	0	0	0	0	0	0	0	0	0	1	0	0	0	0
sp|Q5HPS8|SYP_STAEQ - Proline--tRNA ligase OS=Staphylococcus epidermidis (strain ATCC 35984 / RP62A) OX=176279 GN=proS PE=3 SV=1 xxxxx	0	0	0	0	0	0	0	0	0	0	0	0	1	0	0	0	0
Reverse_tr|Q5HPV7|Q5H - Chromosome partition protein Smc OS=Staphylococcus epidermidis (strain ATCC 35984 / RP62A) OX=176279 GN=smc PE=3 SV=1 xxxxx	0	0	0	0	0	0	0	0	0	0	0	0	1	0	0	0	0
sp|Q5HQJ5|ADDB_STAEQ - ATP-dependent helicase/deoxyribonuclease subunit B OS=Staphylococcus epidermidis (strain ATCC 35984 / RP62A) OX=176279 GN=addB PE=3 SV=1 xxxxx	0	0	0	0	0	0	0	0	0	0	0	0	1	0	0	0	0
sp|Q5HQ35|SYFB_STAEQ - Phenylalanine--tRNA ligase beta subunit OS=Staphylococcus epidermidis (strain ATCC 35984 / RP62A) OX=176279 GN=pheT PE=3 SV=1 xxxxx	0	0	0	0	0	0	0	0	0	0	0	0	1	0	0	0	0
sp|Q5HK19|WALK_STAEQ - Sensor protein kinase WalK OS=Staphylococcus epidermidis (strain ATCC 35984 / RP62A) OX=176279 GN=walK PE=1 SV=1 xxxxx	0	0	0	0	0	0	0	0	0	0	0	0	1	0	0	0	0
tr|Q5HLQ4|Q5HLQ4_STAE - Uncharacterized protein OS=Staphylococcus epidermidis (strain ATCC 35984 / RP62A) OX=176279 GN=SERP1929 PE=4 SV=1 xxxxx	0	1	0	0	0	0	0	0	0	0	0	0	0	0	0	0	0
Reverse_tr|Q5HQT3|Q5H - Uncharacterized protein OS=Staphylococcus epidermidis (strain ATCC 35984 / RP62A) OX=176279 GN=SERP0464 PE=4 SV=1 xxxxx	0	1	0	0	0	0	0	0	0	0	0	0	0	0	0	0	0
Reverse_sp|Q5HMA2|RL3 - 50S ribosomal protein L31 type B OS=Staphylococcus epidermidis (strain ATCC 35984 / RP62A) OX=176279 GN=rpmE2 PE=3 SV=1 xxxxx	0	1	0	0	0	0	0	0	0	0	0	0	0	0	0	0	0
tr|Q5HLC1|Q5HLC1_STAE - Uncharacterized protein OS=Staphylococcus epidermidis (strain ATCC 35984 / RP62A) OX=176279 GN=SERP2066 PE=4 SV=1 xxxxx	0	1	0	0	0	0	0	0	0	0	0	0	0	0	0	0	0
tr|Q5HRN0|Q5HRN0_STAE - UvrB/UvrC domain protein OS=Staphylococcus epidermidis (strain ATCC 35984 / RP62A) OX=176279 GN=SERP0163 PE=4 SV=1 xxxxx	0	1	0	0	0	0	0	0	0	0	0	0	0	0	0	0	0
tr|Q5HMI5|Q5HMI5_STAE - Uncharacterized protein OS=Staphylococcus epidermidis (strain ATCC 35984 / RP62A) OX=176279 GN=SERP1643 PE=4 SV=1 xxxxx	0	1	0	0	0	0	0	0	0	0	0	0	0	0	0	0	0
Reverse_sp|Q5HKA2|Y24 - Uncharacterized lipoprotein SERP2447 OS=Staphylococcus epidermidis (strain ATCC 35984 / RP62A) OX=176279 GN=SERP2447 PE=3 SV=1 xxxxx	0	1	0	0	0	0	0	0	0	0	0	0	0	0	0	0	0
Reverse_sp|Q5HQW4|TRX - Thioredoxin reductase OS=Staphylococcus epidermidis (strain ATCC 35984 / RP62A) OX=176279 GN=trxB PE=3 SV=1 xxxxx	0	1	0	0	0	0	0	0	0	0	0	0	0	0	0	0	0
tr|Q5HRU3|Q5HRU3_STAE - Lipoprotein OS=Staphylococcus epidermidis (strain ATCC 35984 / RP62A) OX=176279 GN=SERP0099 PE=3 SV=1 xxxxx	0	1	0	0	0	0	0	0	0	0	0	0	0	0	0	0	0
sp|Q5HNH4|FTHS_STAEQ - Formate--tetrahydrofolate ligase OS=Staphylococcus epidermidis (strain ATCC 35984 / RP62A) OX=176279 GN=fhs PE=3 SV=1 xxxxx	0	1	0	0	0	0	0	0	0	0	0	0	0	0	0	0	0
sp|Q5HN35|GATB_STAEQ - Aspartyl/glutamyl-tRNA(Asn/Gln) amidotransferase subunit B OS=Staphylococcus epidermidis (strain ATCC 35984 / RP62A) OX=176279 GN=gatB PE=3 SV=1 xxxxx	0	1	0	0	0	0	0	0	0	0	0	0	0	0	0	0	0
Reverse_sp|Q5HNH4|FTH - Formate--tetrahydrofolate ligase OS=Staphylococcus epidermidis (strain ATCC 35984 / RP62A) OX=176279 GN=fhs PE=3 SV=1 xxxxx	0	1	0	0	0	0	0	0	0	0	0	0	0	0	0	0	0
tr|Q5HQU6|Q5HQU6_STAE - Ribonuclease R OS=Staphylococcus epidermidis (strain ATCC 35984 / RP62A) OX=176279 GN=rnr PE=3 SV=1 xxxxx	0	1	0	0	0	0	0	0	0	0	0	0	0	0	0	0	0
Reverse_tr|Q5HRA0|Q5H - Iron-dependent repressor OS=Staphylococcus epidermidis (strain ATCC 35984 / RP62A) OX=176279 GN=sirR PE=4 SV=1 xxxxx	0	0	0	0	0	0	0	0	0	0	0	0	0	0	0	0	1
Reverse_tr|Q5HKL8|Q5H - Acetoin dehydrogenase, E1 component, alpha subunit OS=Staphylococcus epidermidis (strain ATCC 35984 / RP62A) OX=176279 GN=SERP2326 PE=4 SV=1 xxxxx	0	0	0	0	0	0	0	0	0	0	0	0	0	0	0	0	1
tr|Q5HN89|Q5HN89_STAE - Transcriptional regulator, Cro/CI family OS=Staphylococcus epidermidis (strain ATCC 35984 / RP62A) OX=176279 GN=SERP1383 PE=4 SV=1 xxxxx	0	0	0	0	0	0	0	0	0	0	0	0	0	0	0	0	1
sp|Q5HRH7|HPS_STAEQ - 3-hexulose-6-phosphate synthase OS=Staphylococcus epidermidis (strain ATCC 35984 / RP62A) OX=176279 GN=SERP0216 PE=3 SV=1 xxxxx	0	0	0	0	0	0	0	0	0	0	0	0	0	0	0	0	1
Reverse_tr|Q5HLC4|Q5H - Esterase, putative OS=Staphylococcus epidermidis (strain ATCC 35984 / RP62A) OX=176279 GN=SERP2063 PE=4 SV=1 xxxxx	0	0	0	0	0	0	0	0	0	0	0	0	0	0	0	0	1
sp|Q5HPX0|RSGA_STAEQ - Small ribosomal subunit biogenesis GTPase RsgA OS=Staphylococcus epidermidis (strain ATCC 35984 / RP62A) OX=176279 GN=rsgA PE=3 SV=1 xxxxx	0	0	0	0	0	0	0	0	0	0	0	0	0	0	0	0	1
tr|Q5HN11|Q5HN11_STAE - Beta-lactamase OS=Staphylococcus epidermidis (strain ATCC 35984 / RP62A) OX=176279 GN=blaZ-1 PE=3 SV=1 xxxxx	0	0	0	0	0	0	0	0	0	0	0	0	0	0	0	0	1
Reverse_tr|Q5HP39|Q5H - Uncharacterized protein OS=Staphylococcus epidermidis (strain ATCC 35984 / RP62A) OX=176279 GN=SERP1074 PE=4 SV=1 xxxxx	0	0	0	0	0	0	0	0	0	0	0	0	0	0	0	0	1
Reverse_sp|Q5HQV3|PGK - Phosphoglycerate kinase OS=Staphylococcus epidermidis (strain ATCC 35984 / RP62A) OX=176279 GN=pgk PE=3 SV=1 xxxxx	0	0	0	0	0	0	0	0	0	0	0	0	0	0	0	0	1
tr|Q5HQ92|Q5HQ92_STAE - 67 kDa Myosin-crossreactive antigen OS=Staphylococcus epidermidis (strain ATCC 35984 / RP62A) OX=176279 GN=SERP0663 PE=4 SV=1 xxxxx	0	0	0	0	0	0	0	0	0	0	0	0	0	0	0	0	1
tr|Q5HMA1|Q5HMA1_STAE - Transcription termination factor Rho OS=Staphylococcus epidermidis (strain ATCC 35984 / RP62A) OX=176279 GN=rho PE=3 SV=1 xxxxx	0	0	0	0	0	0	0	0	0	0	0	0	0	0	0	0	1
tr|Q5HR06|Q5HR06_STAE - Aldehyde-alcohol dehydrogenase OS=Staphylococcus epidermidis (strain ATCC 35984 / RP62A) OX=176279 GN=SERP0389 PE=3 SV=1 xxxxx	0	0	0	0	0	0	0	0	0	0	0	0	0	0	0	0	1
tr|Q5HMI3|Q5HMI3_STAE - Uncharacterized protein OS=Staphylococcus epidermidis (strain ATCC 35984 / RP62A) OX=176279 GN=SERP1645 PE=4 SV=1 xxxxx	0	0	0	0	0	0	0	0	0	0	0	0	0	0	0	0	1
sp|Q5HQJ4|ADDA_STAEQ - ATP-dependent helicase/nuclease subunit A OS=Staphylococcus epidermidis (strain ATCC 35984 / RP62A) OX=176279 GN=addA PE=3 SV=1 xxxxx	0	0	0	0	0	0	0	0	0	0	0	0	0	0	0	0	1
tr|Q5HKF4|Q5HKF4_STAE - Cell wall associated biofilm protein OS=Staphylococcus epidermidis (strain ATCC 35984 / RP62A) OX=176279 GN=bhp PE=4 SV=1 xxxxx	0	0	0	0	0	0	0	0	0	0	0	0	0	0	0	0	1
Reverse_tr|Q5HMZ3|Q5H - Cell wall surface anchor family protein OS=Staphylococcus epidermidis (strain ATCC 35984 / RP62A) OX=176279 GN=SERP1482 PE=4 SV=1 xxxxx	0	0	0	0	0	0	0	0	0	0	0	0	0	0	0	0	1

## Sheet: genomics summary
S. epidermidis RP62A Uniprot ID (gene locus)	NIH LM031	W23144	NIH LM061	NIH LM040	NIH LM087	NIH LM095	RP62A	NIH LM088	NIH05001	NIH LM049	NIH LM018	SK135	BCM-HMP0060	ATCC 14990	ATCC 12228
Q5HKP6 (SERP2297)	x	x	x	x	x	x	x	x	x	x	x	x	x	x	x
Q5HKK8 (SERP2336)	x	x	x		x	x	x	x	x	x	x	x	x	x	x
Q5HKF8 (SERP2388)	x	x	x	x	x	x	x	x	x	x	x	x	x	x	x
Q5HS21 (SERP0018)	x	x	x	x	x	x	x	x	x	x	x	x	x	x	x
Q5HLF2 (SERP2035)	x	x	x	x	x	x	x	x	x	x	x	x	x	x	x
Q5HL78 (SERP2109)	x	x	x	x	x	x	x	x	x	x	x	x	x	x	x
Q5HPN9 (SERP0869)	x	x	x	x	x	x	x	x	x	x	x	x	x	x	x
Q5HM42 (SERP1788)	x	x	x	x	x	x	x	x	x	x	x	x	x	x	x
Q5HKU7 (SERP2245)	x	x	x	x	x	x	x	x	x	x	x	x	x	x	x
Q5HKJ1 (SERP2354)	x	x	x	x	x	x	x	x	x	x	x	x	x	x	x
Q5HNB6 (SERP1354)	x		x	x			x		x	x	x	x	x	x
Q5HQU7 (SERP0449)	x	x	x	x	x	x	x	x	x	x	x	x	x	x	x
Q5HRV2 (SERP0090)	x	x	x	x	x	x	x	x	x	x	x	x	x	x	x
Q5HQF0 (SERP0603)	x	x	x	x	x	x	x	x	x	x	x	x	x	x	x
Q5HR84 (SERP0309)	x	x	x	x	x	x	x	x	x	x	x	x	x	x	x
Q5HQW0 (SERP0436)	x	x	x	x	x	x	x	x	x	x	x	x	x	x	x
Q5HN75 (SERP1397)	x	x	x	x	x	x	x	x	x	x	x	x	x	x	x
Q5HKE5 (SERP2401)	x	x	x	x	x	x	x	x	x	x	x	x	x	x	x
